# Supplementary material
Source: publisher figshare collection journal article supplement (https://gsajournals.figshare.com/ndownloader/files/14217899)
Supplement: Supplementary file 1 [file 14217899]

**SUPPLEMENTAL MATERIAL**

**Identification and functional testing of novel interacting protein partners for the stress sensors Wsc1p and Mid2p of *Saccharomyces cerevisiae*.**

Ednalise Santiago-Cartagena*, Sahily González-Crespo*,Vladimir Vélez*, Nelson Martínez*, Jamie Snider‡, Matthew Jessulat**, Hiroyuki Aoki **, Zoran Minic**, Pearl Akamine*,†, Inoushka Mejías*, Luis M. Pérez*, Brian C. Rymond††, Mohan Babu**, Igor Stagljar‡,§, and José R. Rodríguez-Medina*,1

**Table S1.** Strains used in this study.

**Table S2.** Oligonucleotides used in this study.

**Figure S1.** NubG/I test for integrated C-tagged Wsc1p and Mid2p.

**Figure S2.** Localization of Wsc1p and Mid2p.

**Figure S3.** Validation of MYTH-tagged Mid2p and Wsc1p expression by Western blot.

**Figure S4.** WSC1 and MID2 - iMYTH interactome showing only interactors identified in the iMYTH screen at 30o.

**Figure S5.** Growth curve analysis of single and double mutants exposed at different concentrations of Hydrogen Peroxide.

**Figure S6.** Growth curve analysis of single and double mutants exposed at different concentrations of Caspofungin.

**Figure S7.** Western blot analysis showing the phosphorylation of Slt2p in single and double mutant strains treated with 1mM hydrogen peroxide (H2O2) for 1 hr at 27°.

**Figure S8.** Western blot analysis showing the phosphorylation of Slt2p in single and double mutant strains treated with 75ng/ml Caspofungin for 1 hr at 27°.

**Figure S9.** Network graph of the Wsc1p and Mid2p interactome identified by iMYTH screen at 37o.

**Table S3.** Percentages of positive interactors for Wsc1p and Mid2p identified by two independent iMYTH screens performed at 37o.

**Figure S10.** A representative drop dilution assayof sensor and interactor null mutants exposed to stress conditions.

**Table S1. Strains used in this study**

| Strain | Genotype | Source |
| --- | --- | --- |
| Wsc1 THY L2 | *MATa leu2 ura3 trp1::(lexAop)-lacZ (lexAop)-HIS3 (lexAop)-ADE2 WSC1::(Cub-lexA-VP16-KanMX)* | This study |
| Wsc1 L40 L3 | *MATa trp1 leu2 his3 ade2 LYS2::lexA-HIS3 URA3::lexA-lacZ WSC1::(Cub-YFP-lexA-VP16-KanMX)* | This study |
| Mid2 THY L3 | *MATa leu2 ura3 trp1::(lexAop)-lacZ (lexAop)-HIS3 (lexAop)-ADE2 MID2::(Cub-YFP-lexA-VP16-KanMX)* | This study |
| Mid2 L40 L3 | *MATa trp1 leu2 his3 ade2 LYS2::lexA-HIS3 URA3::lexA-lacZ MID2::(Cub-YFP-lexA-VP16-KanMX)* | This study |
| THY.AP4 | *MATa leu2 ura3 trp1::(lexAop)-lacZ (lexAop)-HIS3 (lexAop)-ADE2* | Paumi *et al.* 2007 |
| L40 | *MATa trp1 leu2 his3 ade2 LYS2::lexA-HIS3 URA3::lexA-lacZ* | Paumi *et al.* 2007 |
| Artificial Bait in THY (A0286) - control | *MATa leu2 ura3 trp1::(lexAop)-lacZ (lexAop)-HIS3 (lexAop)-ADE2 Matα-CD4(TM)::(Cub-YFP-lexA-VP16-KanMX)* | Snider *et al.* 2013 |
| Artificial Bait in L40 (A0287) - control | *MATa his3-200 trp1-901 leu2-3 112 ade2 LYS2::(lexAop)4-HIS3 URA3::(lexAop)8-lacZ GAL4 Matα-CD4(TM)::(Cub-YFP-lexA-VP16-KanMX)* | Snider *et al.* 2013 |
| BY4742 (wild type α, wt-α) | *MATα his3∆1 leu2∆0 lys2∆0 ura3∆0* | ATCC |
| YOR008C (*wsc1∆*) | *MATα his3∆1 leu2∆0 lys2∆0 ura3∆0 wsc1∆::KanMX4* | Open Biosystems |
| YLR332W (*mid2∆*) | *MATα his3∆1 leu2∆0 lys2∆0 ura3∆0 mid2∆::KanMX4* | Open Biosystems |
| YLR332W (*mid2∆*) | *MATa his3∆1 leu2∆0 met15∆0 mid2∆::URA3* | This study |
| YCR088W (*abp1∆*) | *MATα his3∆1 leu2∆0 lys2∆0 ura3∆0 abp1∆::KanMX4* | Open Biosystems |
| YNL259C (*atx1Δ*) | *MATα his3∆1 leu2∆0 lys2∆0 ura3∆0 atx1∆::KanMX4* | Open Biosystems |
| YGR282C (*bgl2Δ*) | *MATα his3∆1 leu2∆0 lys2∆0 ura3∆0 bgl2∆::KanMX4* | Open Biosystems |
| YLR429W(*crn1Δ*) | *MATα his3∆1 leu2∆0 lys2∆0 ura3∆0 crn1∆::KanMX4* | Open Biosystems |
| YPL037C (*egd1Δ*) | *MATα his3∆1 leu2∆0 lys2∆0 ura3∆0 egd1∆::KanMX4* | Open Biosystems |
| YHR193C (*egd2Δ*) | *MATα his3∆1 leu2∆0 lys2∆0 ura3∆0 egd2∆::KanMX4* | Open Biosystems |
| YNL135C (*fpr1Δ*) | *MATα his3∆1 leu2∆0 lys2∆0 ura3∆0 fpr1∆::KanMX4* | Open Biosystems |
| YCL035C (*grx1Δ*) | *MATα his3∆1 leu2∆0 lys2∆0 ura3∆0 grx1∆::KanMX4* | Open Biosystems |
| YIR038C (*gtt1Δ*) | *MATα his3∆1 leu2∆0 lys2∆0 ura3∆0 gtt1∆::KanMX4* | Open Biosystems |
| YDR097C (*msh6Δ*) | *MATα his3∆1 leu2∆0 lys2∆0 ura3∆0 msh6∆::KanMX4* | Open Biosystems |
| YDL173W (*par32Δ*) | *MATα his3∆1 leu2∆0 lys2∆0 ura3∆0 par32∆::KanMX4* | Open Biosystems |
| YLR044C (*pdc1Δ*) | *MATα his3∆1 leu2∆0 lys2∆0 ura3∆0 pdc1∆::KanMX4* | Open Biosystems |
| YDR032C (*pst2Δ*) | *MATα his3∆1 leu2∆0 lys2∆0 ura3∆0 pst2∆::KanMX4* | Open Biosystems |
| YNL098C (*ras2Δ*) | *MATα his3∆1 leu2∆0 lys2∆0 ura3∆0 ras2∆::KanMX4* | Open Biosystems |
| YGL031C (*rpl24aΔ*) | *MATα his3∆1 leu2∆0 lys2∆0 ura3∆0 rpl24a∆::KanMX4* | Open Biosystems |
| YIL148W (*rpl40aΔ*) | *MATα his3∆1 leu2∆0 lys2∆0 ura3∆0 rpl40a∆::KanMX4* | Open Biosystems |
| YLR048W (*rps0bΔ*) | *MATα his3∆1 leu2∆0 lys2∆0 ura3∆0 rps0b∆::KanMX4* | Open Biosystems |
| YOR007C (*sgt2Δ*) | *MATα his3∆1 leu2∆0 lys2∆0 ura3∆0 sgt2∆::KanMX4* | Open Biosystems |
|  |  |  |
| YMR183C (*sso2Δ*) | *MATα his3∆1 leu2∆0 lys2∆0 ura3∆0 sso2∆::KanMX4* | Open Biosystems |
| YDL229W (*ssb1Δ*) | *MATα his3∆1 leu2∆0 lys2∆0 ura3∆0 ssb1∆::KanMX4* | Open Biosystems |
| YHR135C (*yck1Δ*) | *MATα his3∆1 leu2∆0 lys2∆0 ura3∆0 yck1∆::KanMX4* | Open Biosystems |
| YPL199C (*ypl199cΔ*) | *MATα his3∆1 leu2∆0 lys2∆0 ura3∆0 ypl199c∆::KanMX4* | Open Biosystems |
| YOL109W (*zeo1Δ*) | *MATα his3∆1 leu2∆0 lys2∆0 ura3∆0 zeo1∆::KanMX4* | Open Biosystems |
| BY4741 (wild type a, wt-a) | *MATa his3Δ1 leu2Δ0 met15Δ0 ura3Δ0* | ATCC |
| Wsc1-TAP | *MATa his3Δ1 leu2Δ0 met15Δ0 ura3Δ0*  *WSC1-TAP::HIS3MX6* | Dharmacon |
| Mid2-TAP | *MATa his3Δ1 leu2Δ0 met15Δ0 ura3Δ0*  *MID2-TAP::HIS3MX6* | Dharmacon |
| Wsc1-GFP | *MATa his3Δ1 leu2Δ0 met15Δ0 ura3Δ0*  *WSC1-GFP::HIS3MX6* | Thermo Fisher |
| Mid2-GFP | *MATa his3Δ1 leu2Δ0 met15Δ0 ura3Δ0*  *MID2-GFP::HIS3MX6* | Thermo Fisher |

**Table S2. Oligonucleotides used in this study**

| Oligonucleotides name | Sequence (5’→3’) |
| --- | --- |
| Rev. KanMX | GAGCGTTTCCCTGCTCGCAG |
| Wsc1 MYTH 5’ | GGG AAA AAC AAC GTT TTA ACA GTG GTC AAT CCA GAC GAA GCT GAT ATG TCG GGG GGG ATC CCT CC |
| Wsc1 MYTH 3’ | GCT CTC CAG CTC TCA AAT TCG AAA TGT ATG AAT TTT TAG AGG ATC ACT ATA GGG AGA CCG GCA G |
| Wsc1 int chk 5’ | CGA GGA GGA GCA CAC CAA AG |
| Fwd Mid2 - MYTH | AAATTCTATGATGAACAAGGTAACGAATTATCACCACGAAATTAT ATG TCG GGG GGG ATC CCT CC |
| Rev Mid2 - MYTH | GAA GGT GAT AAT ATT TGT AAA AAT ACT AAT GAAGTCCACCTACTC ACTATAGGGAGACCGGCAG |
| Int. Fwd Mid2 | CCA ACA CCG CCG ACC ATA AT |
| Fwd NubG | CCGATACCATCGACAACGTTAAGTCG |
| Fw- Abp1 | GCT GCT AGT CCA CTC ATC |
| Fw-Atx1 | GCC GAC ACT CCC CTG CGA AG |
| Fw-Bgl2 | CCC TGC TTC CGT ACC CCA GGG |
| Fw-Crn1 | GCC AGA AAT GTG GGA GGA CC |
| Fw-Egd1 | AAGCAGTATGGCGAAGAACG |
| Fw-Egd2 | GAC TGC CAG CTT TCC CGT CCG |
| Fw-Fpr1 | GCA CGG GAG GAA TTC TGG CG |
| Fw-Grx1 | GAG CAG CCG CAA CGG CGT T |
| Fw-Gtt1 | TTGGGGGAGGACATATTACG |
| Fw-Mek1 | TGC AAG AGG GGT CCT GTG C |
| Fw-Msh6 | TGG GGA GTT TCA AGG CGG T |
| Fw-Par32 | TCG AGG GAG GTG GTC GGA GA |
| Fw-Pdc1 | CGT GTG ATG AGG CTC GTG G |
| Fw-Pst2 | AAG GTG CGT GCG CCT GGC |
| Fw-Rpl24a | TGG CGA CCG AGG GCA GCG TT |
| Fw-Rpl40a | TCC GCC TGG ACA TAG GCG GA |
| Fw-Rps0b | GAG GGT CCC GCT GGA GGT TG |
| Fw-SGT2 | CGT GGC CCA ATG GTC ACG GCG |
| Fw-SSB1 | CAG AGG AGT ACA CAC GGG AC |
| FW-SSO2 | ACG AGC CGG GTA CCA AGC GG |
| Fw-Yck1 | TAC CCC GCC TGT GGG CTC GT |
| Fw-YPL199C | GTG CGC GTG TGG GTA CCT CAA CTG |
| Fw-Zeo1 | CCC GAC GGT CCG GGT GCC TA |
| Fw-Ras2 | CCCCTGCGCCATGTCTCTGC |
| R Kan B | CTGCAGCGAGGAGCCGTAAT |
| Fwd Wsc1-TAP | AGCTCTCAATCACAGGACGC |
| Fwd Mid2TAP | CGTACACACCATCAGCAACC |
| Rev TAP Primer | AACCCGGGGATCCGTCGACC |

Bait:


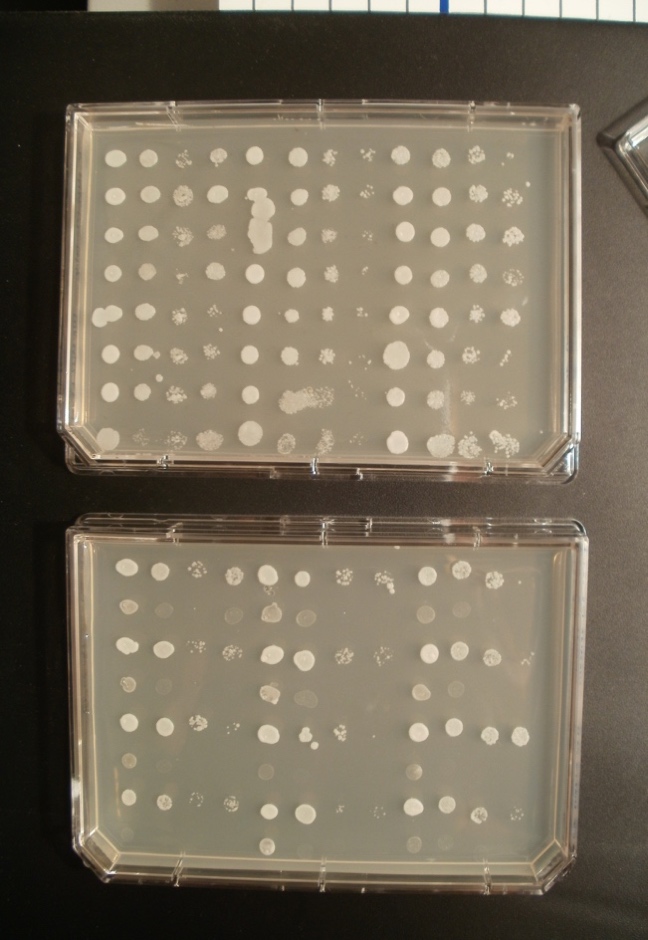

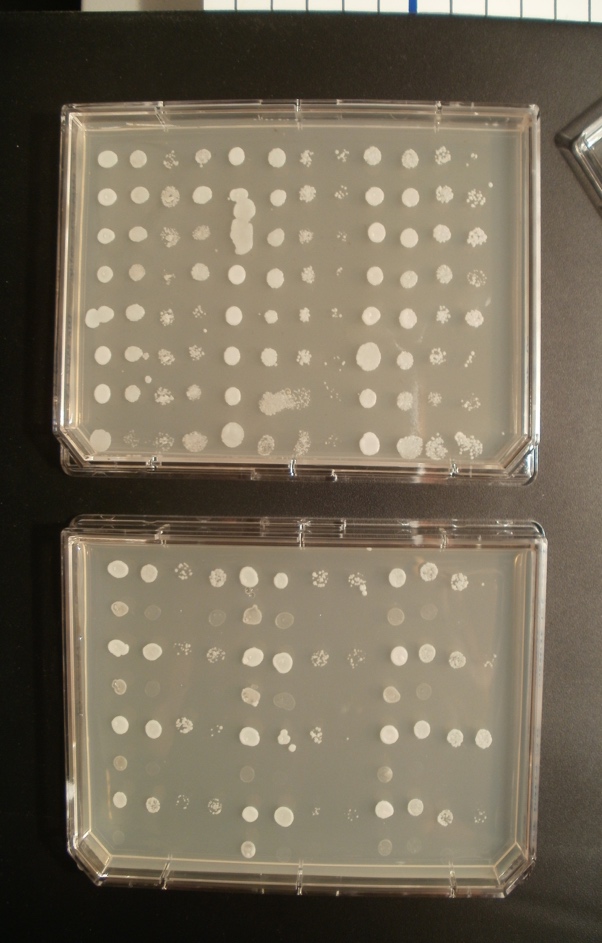

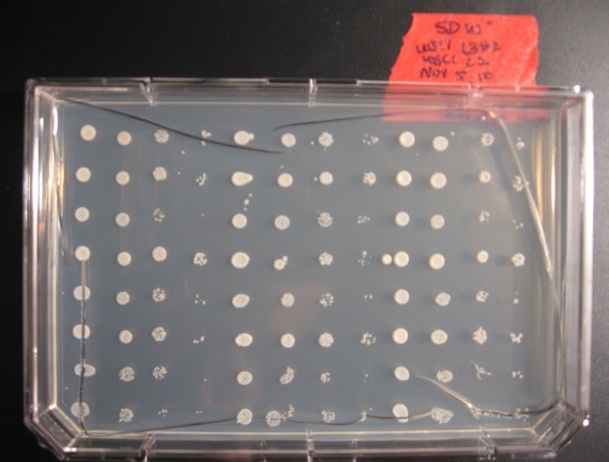

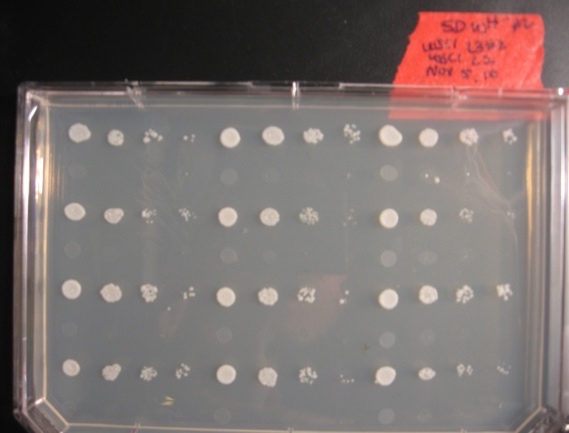


WSC1

L40 L3

MID2

L40 L3

SD –W SD –WAH

100 10-1 10-2 10-3 100 10-1 10-2 10-3

Ost1-NubI

Ost1-NubG

Fur4-NubI

Fur4-NubG

Ost1-NubI

Ost1-NubG

Fur4-NubI

Fur4-NubG

WSC1

THY L2

MID2

THY L3

Bait:

SD –W SD –WH

100 10-1 10-2 10-3 100 10-1 10-2 10-3

Ost1-NubI

Ost1-NubG

Fur4-NubI

Fur4-NubG

Ost1-NubI

Ost1-NubG

Fur4-NubI

Fur4-NubG

1. **B)**

**
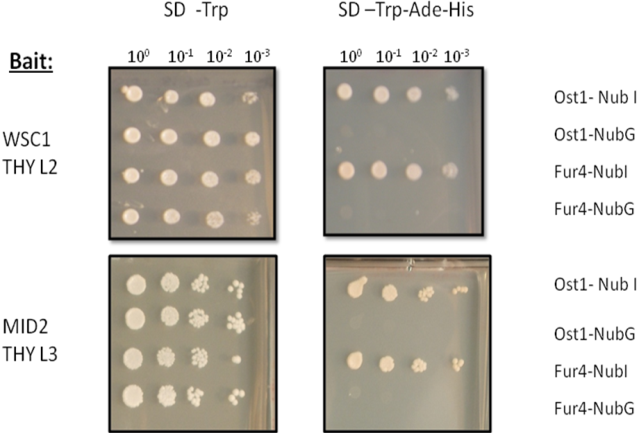
**

**Figure S1.** NubG/I test for integrated C-tagged Wsc1p and Mid2p. A) THY.AP4 and B) L40 background strains. Yeast cells expressing endogenous Wsc1-Cub-LexA-VP16 and Mid2-Cub-LexA-VP16 were transformed with control prey-Nub constructs. Transformations were verified on minimal SD medium depleted of Trp (SD-W). Interaction between the bait and prey was indicated by growth on minimal SD medium lacking Trp, Ade and His (SD-WAH) or Trp and His (SD-WH). Transformants were spotted in serial dilutions. Growth on selective plates with the positive control (Ost1-NubI and Fur4-NubI) and not with the negative control (Ost1-NubG and Fur4-NubG) indicates correct bait expression and lack of self-activation.


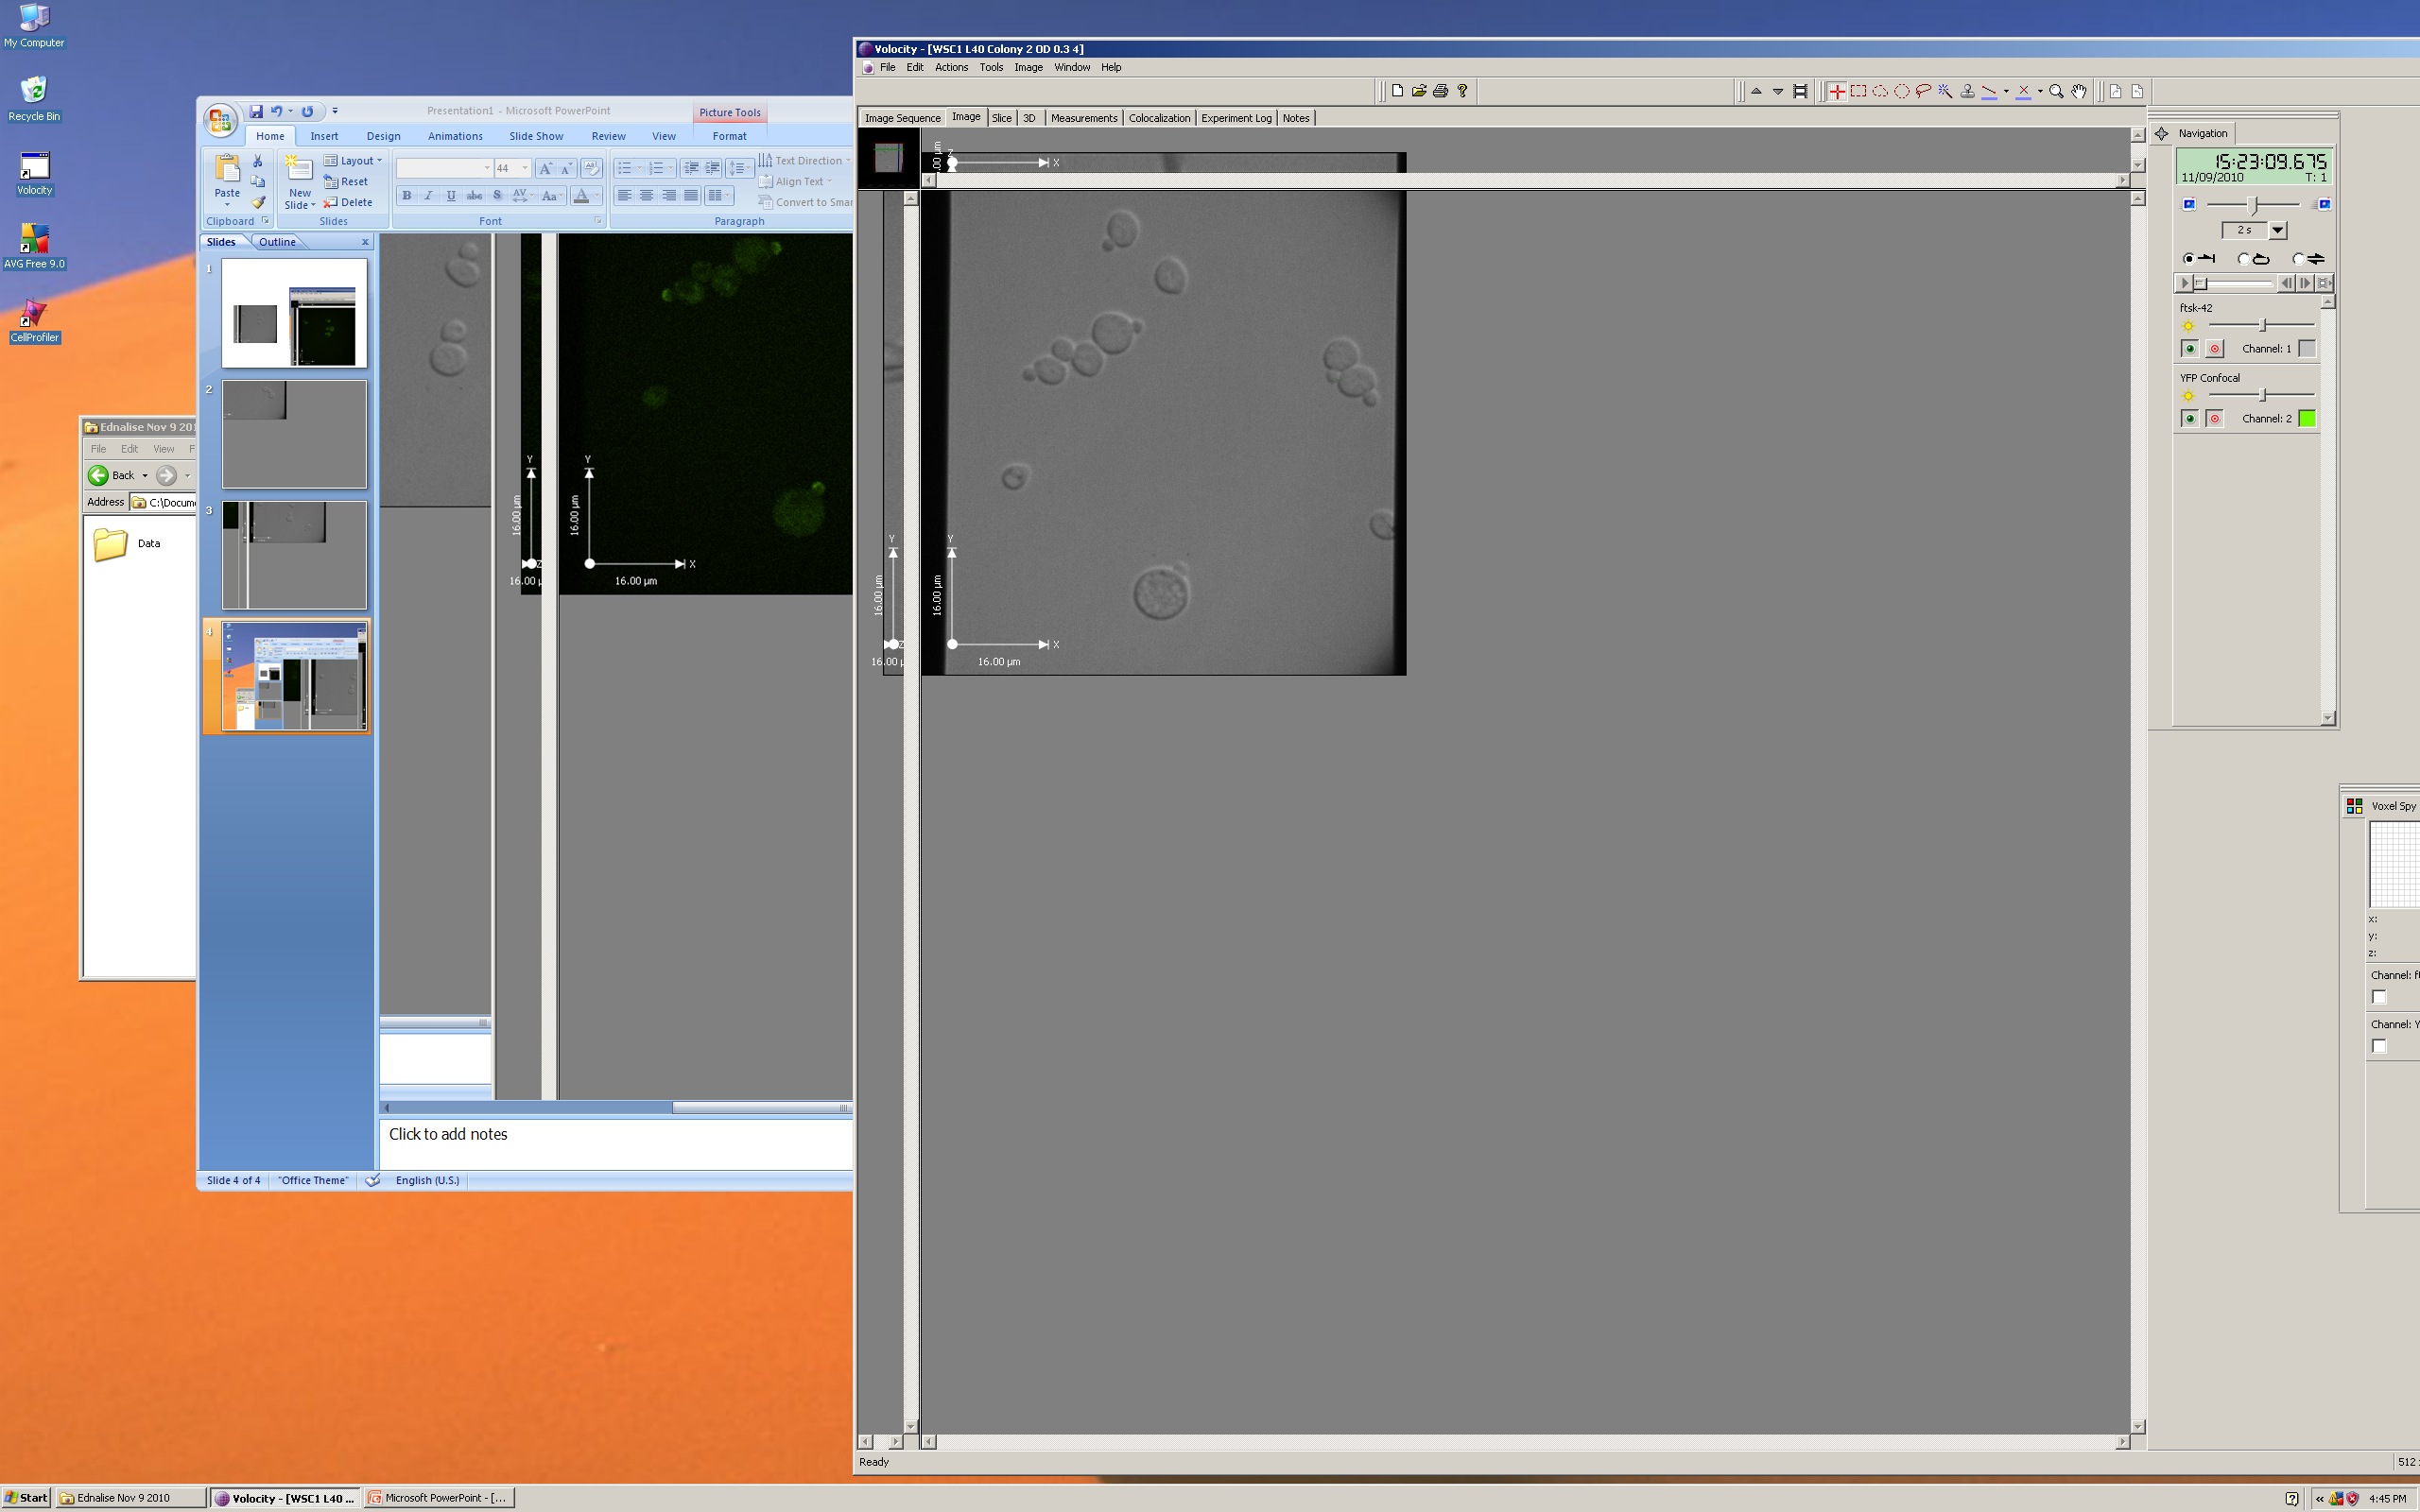

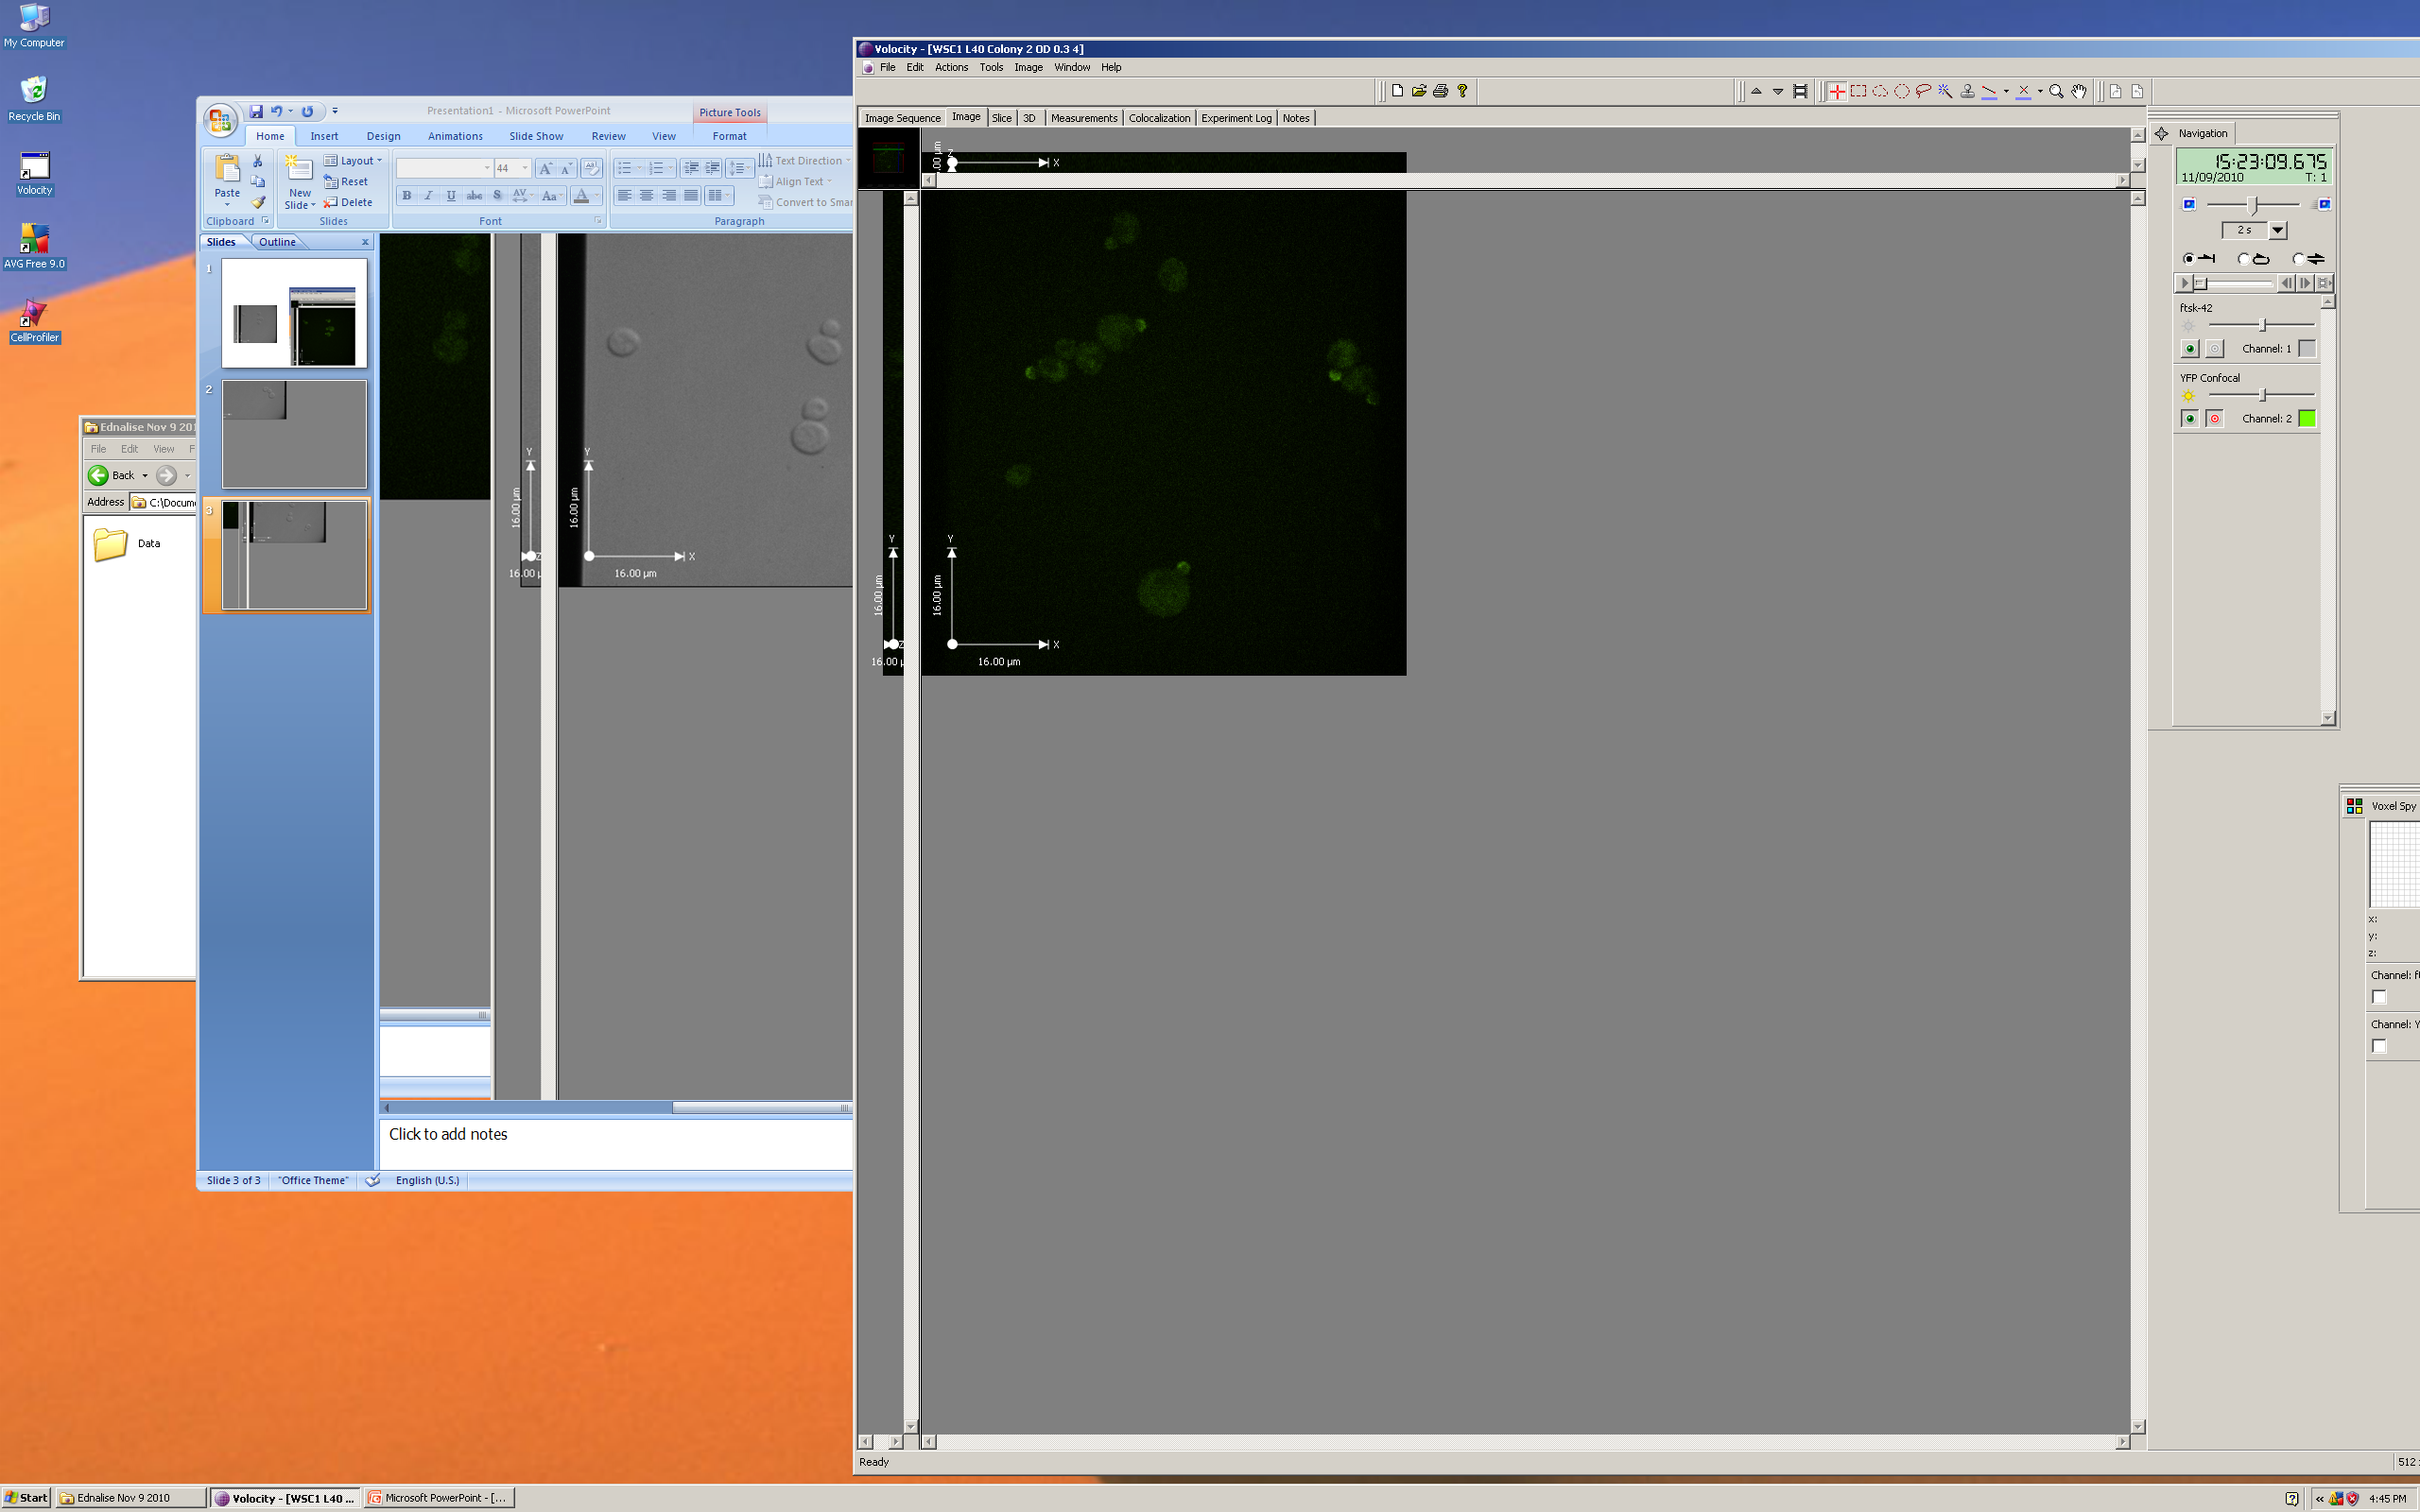

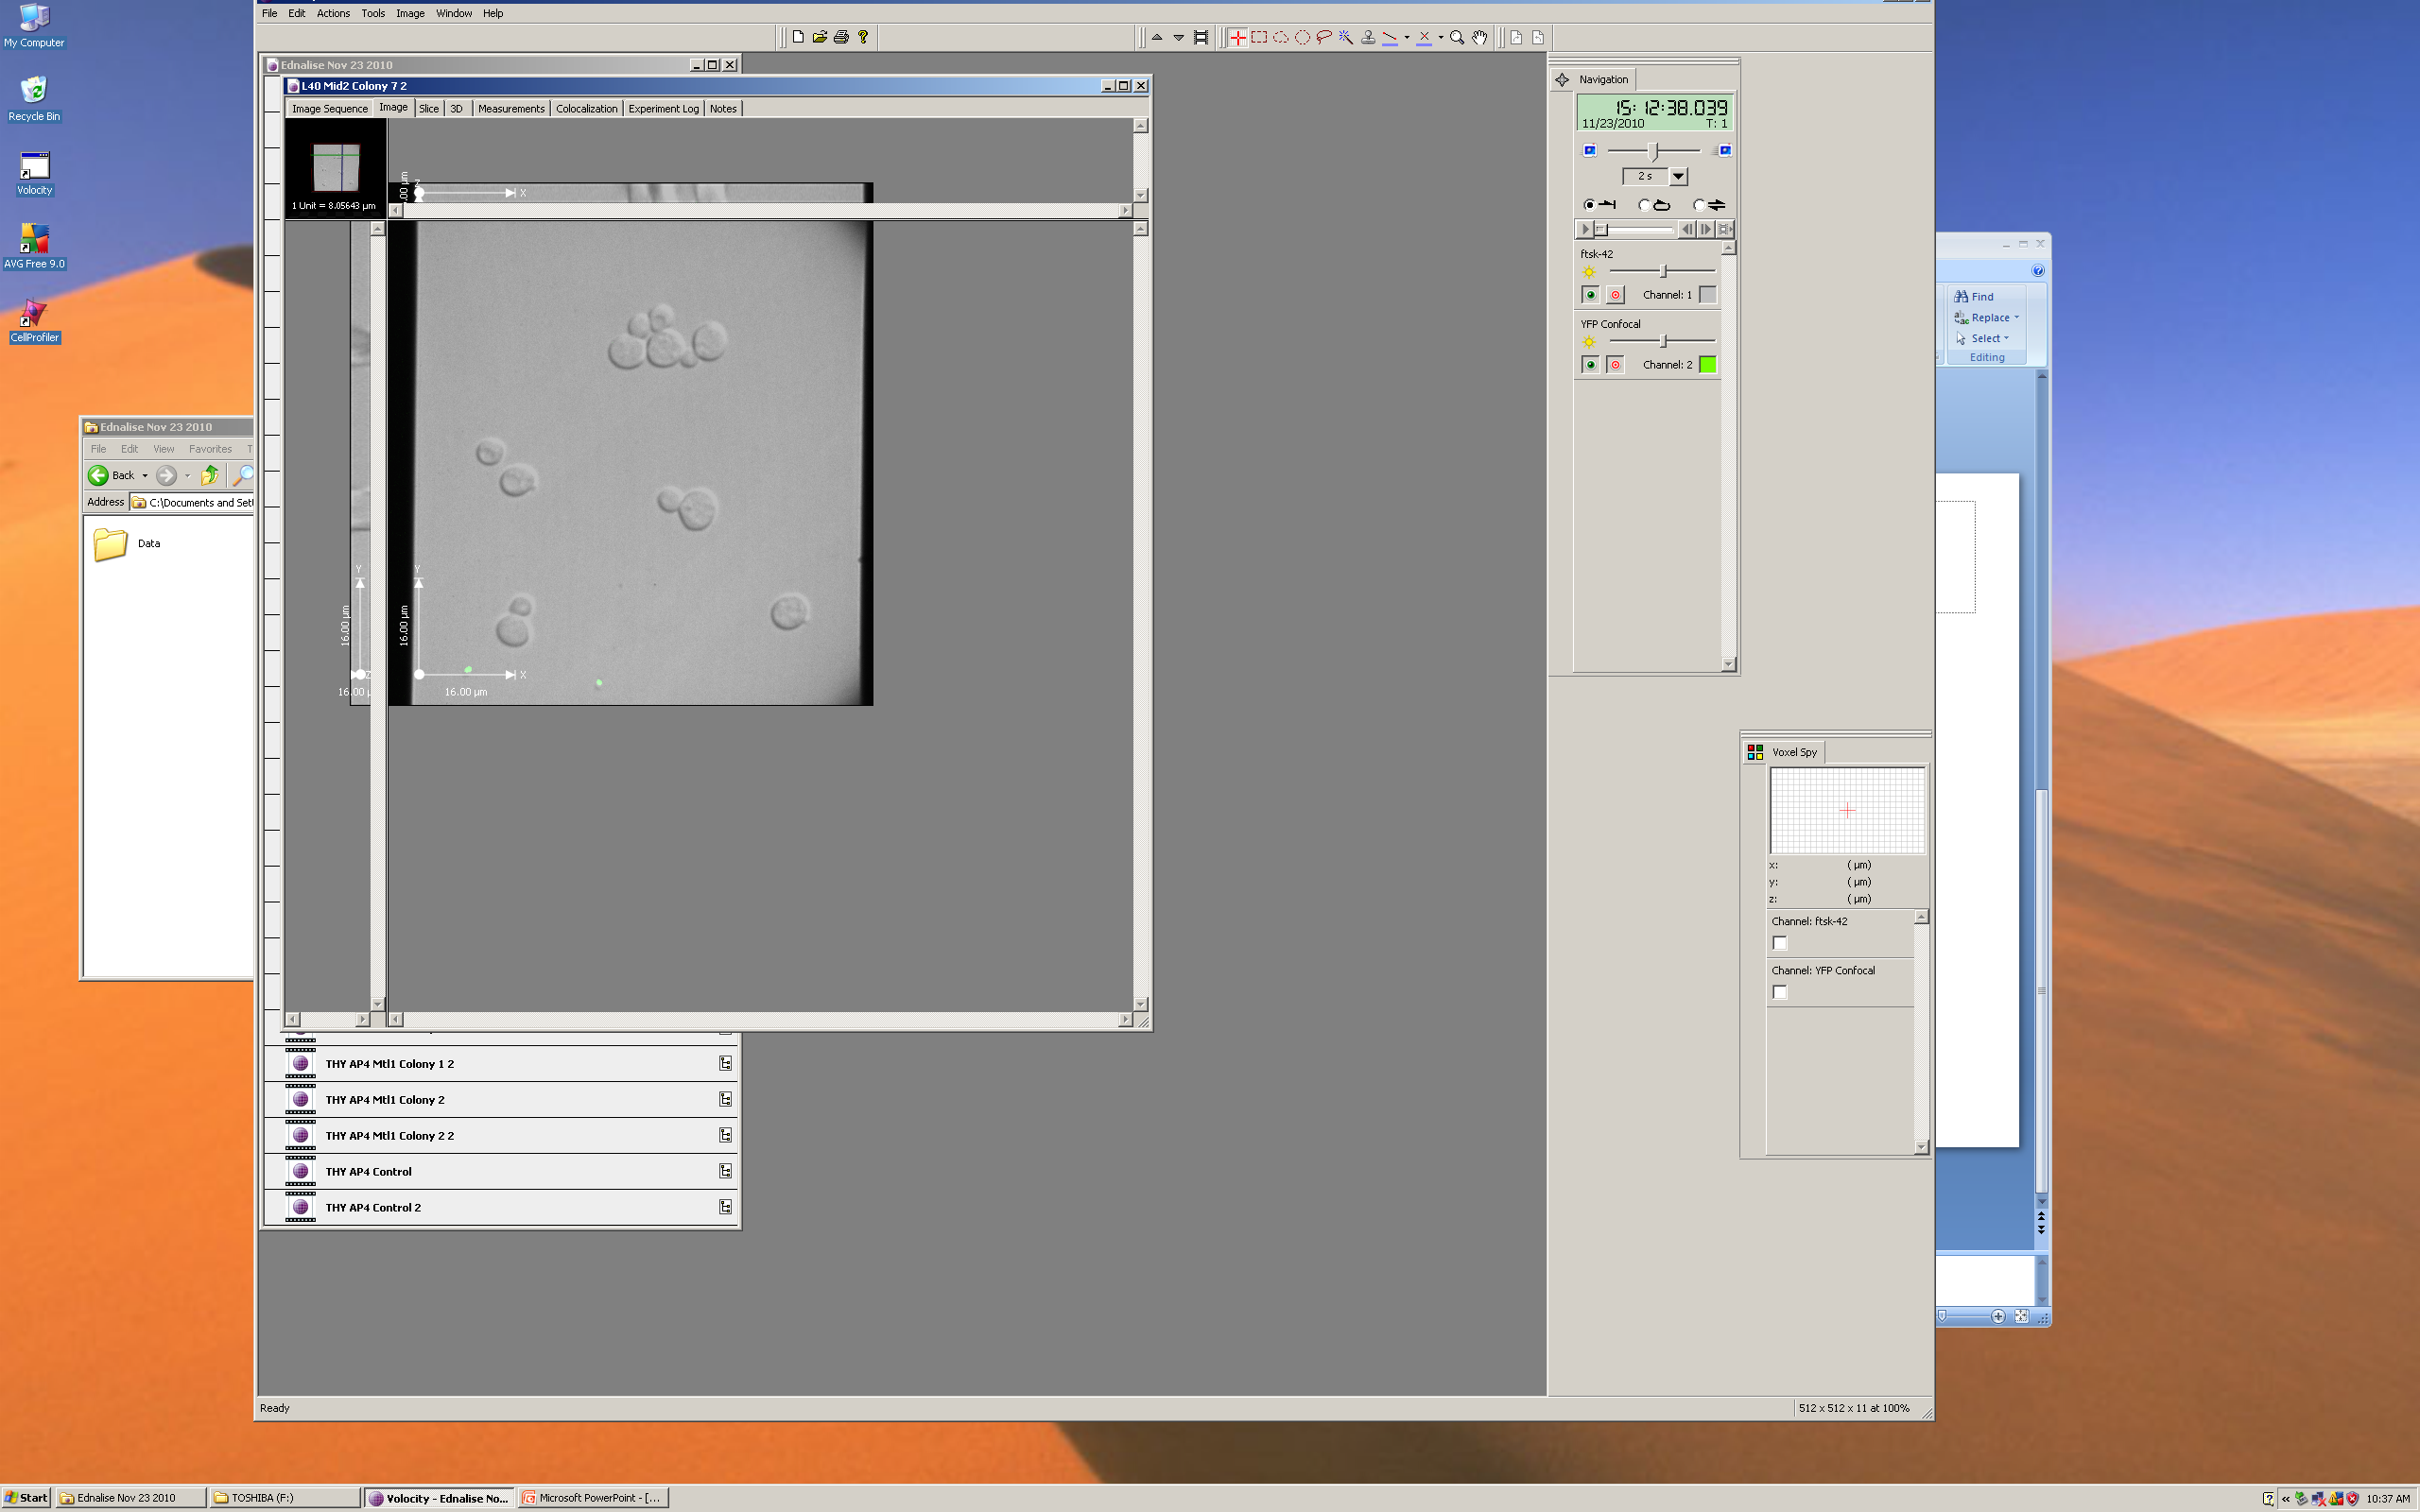

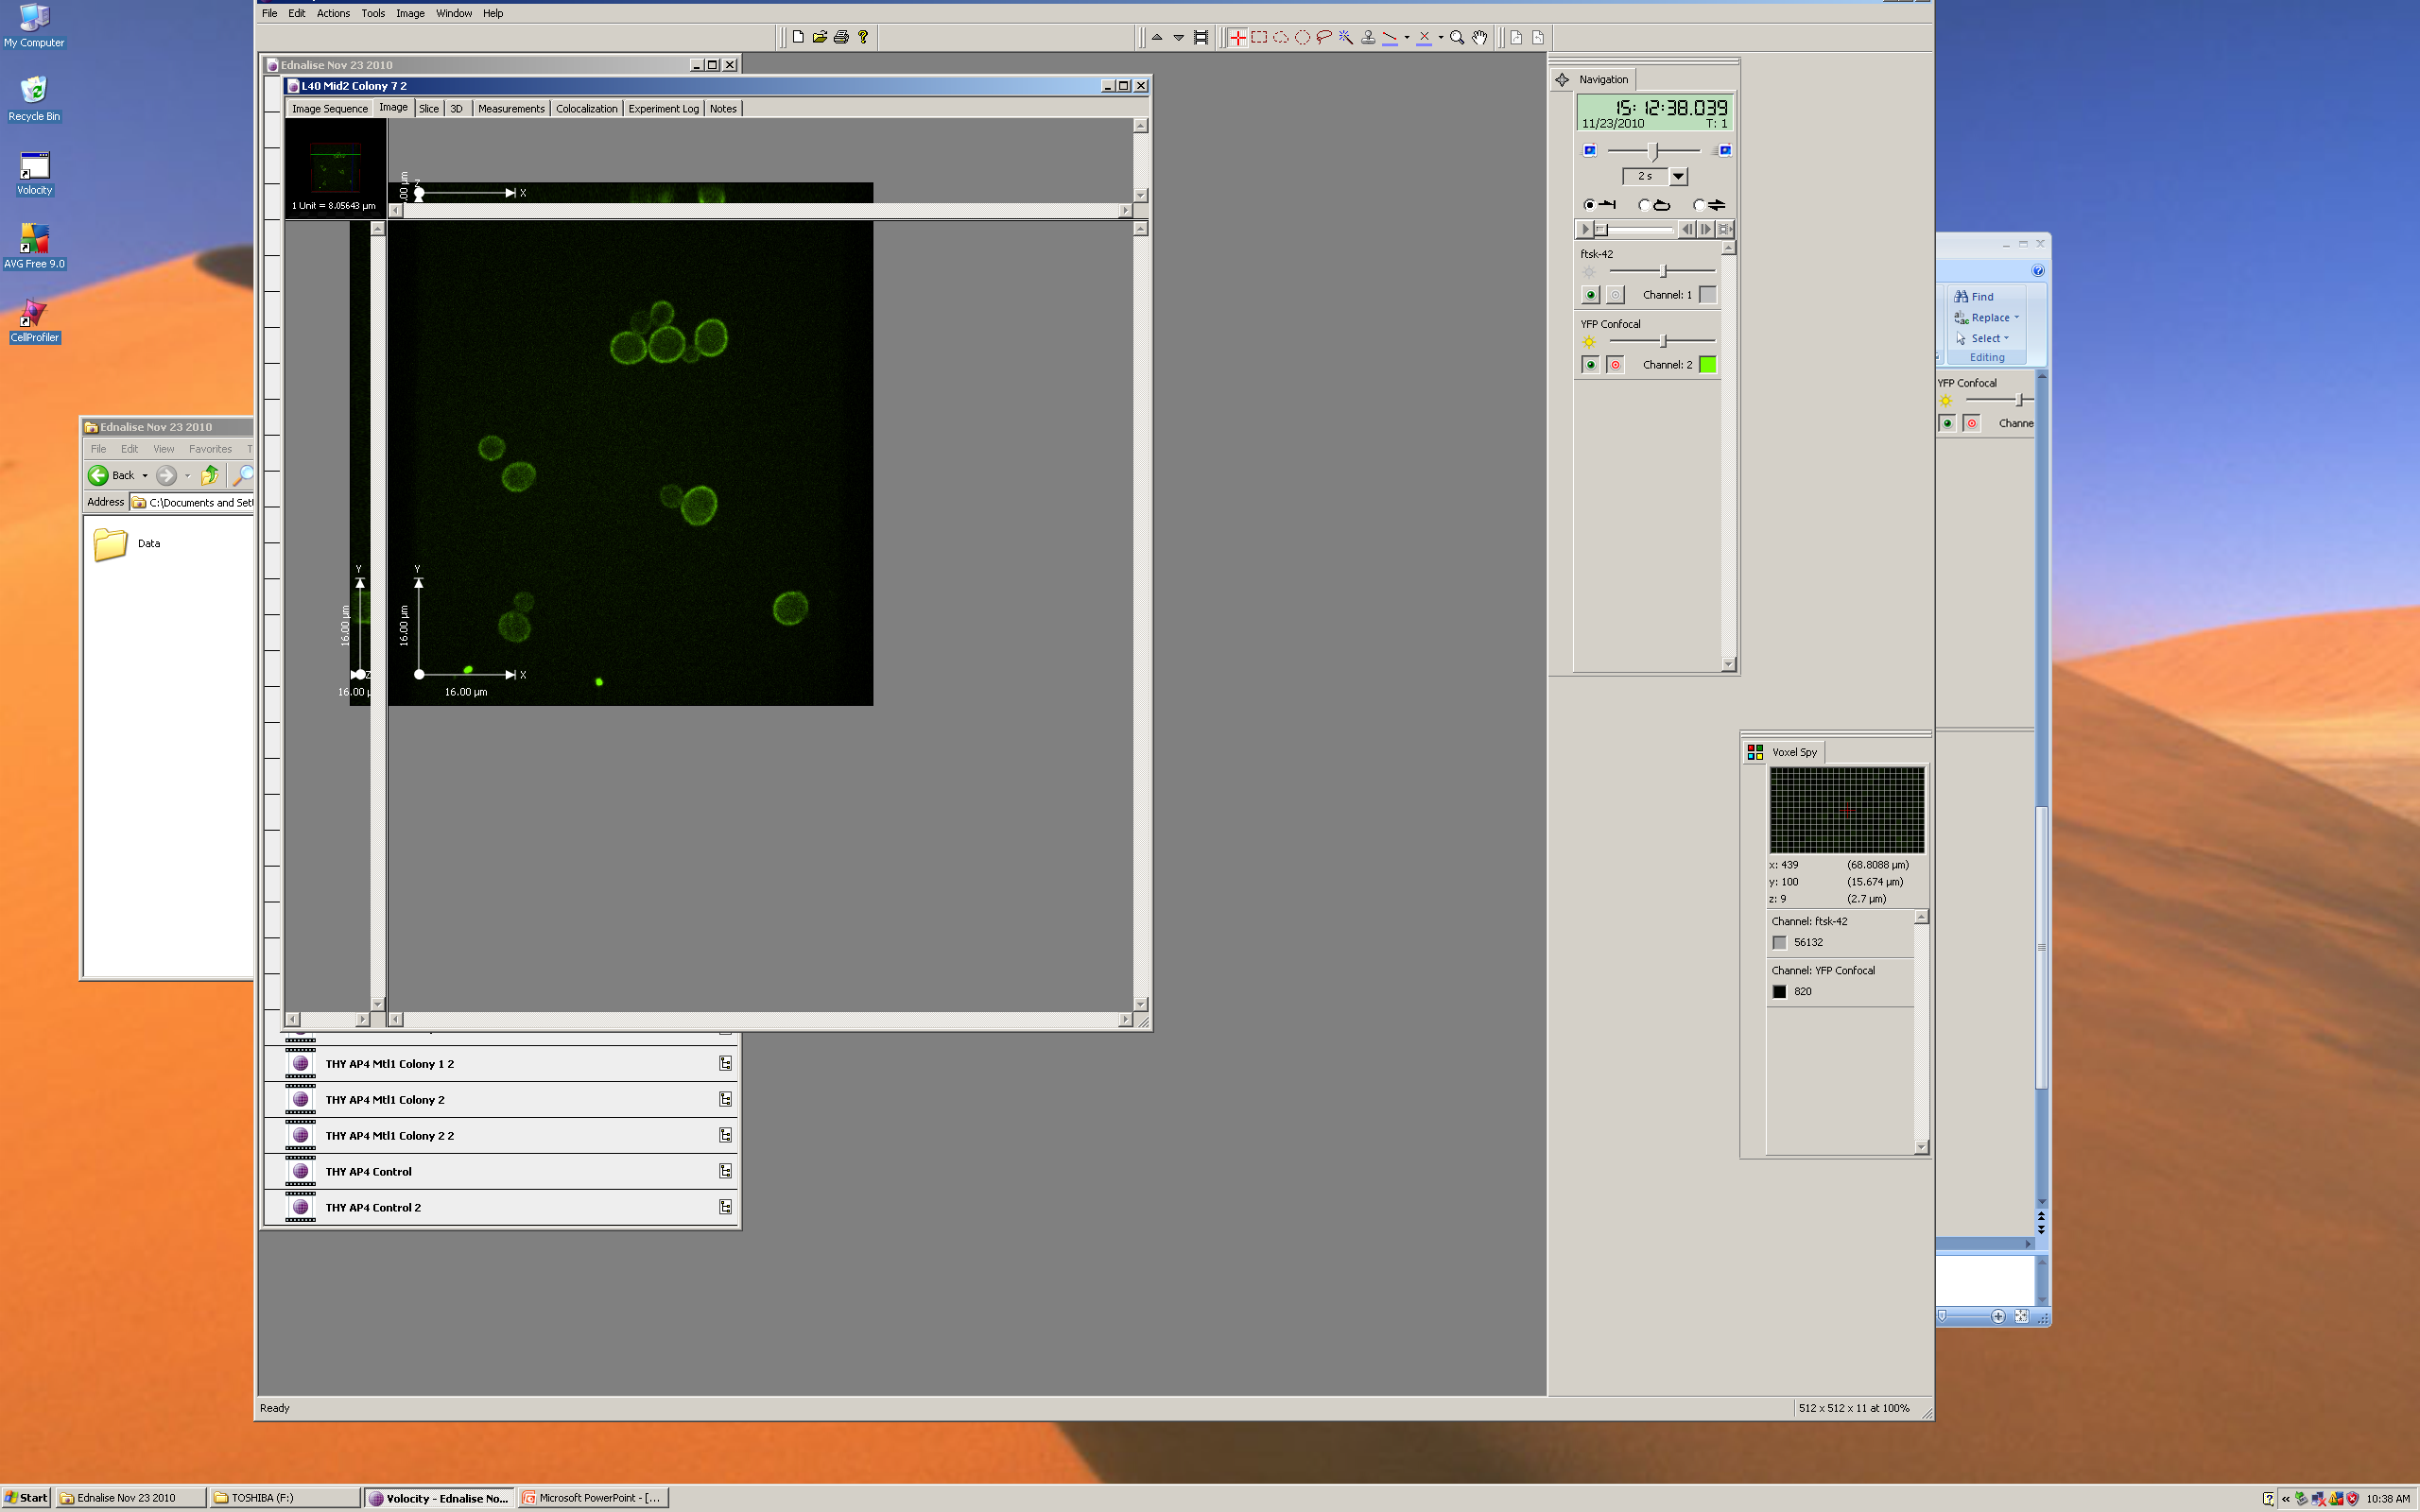


Wsc1 L40 L3 Mid2 L40 L3 Mid2 THY L3

DIC

YFP

**A)**

**B)**

**C)**


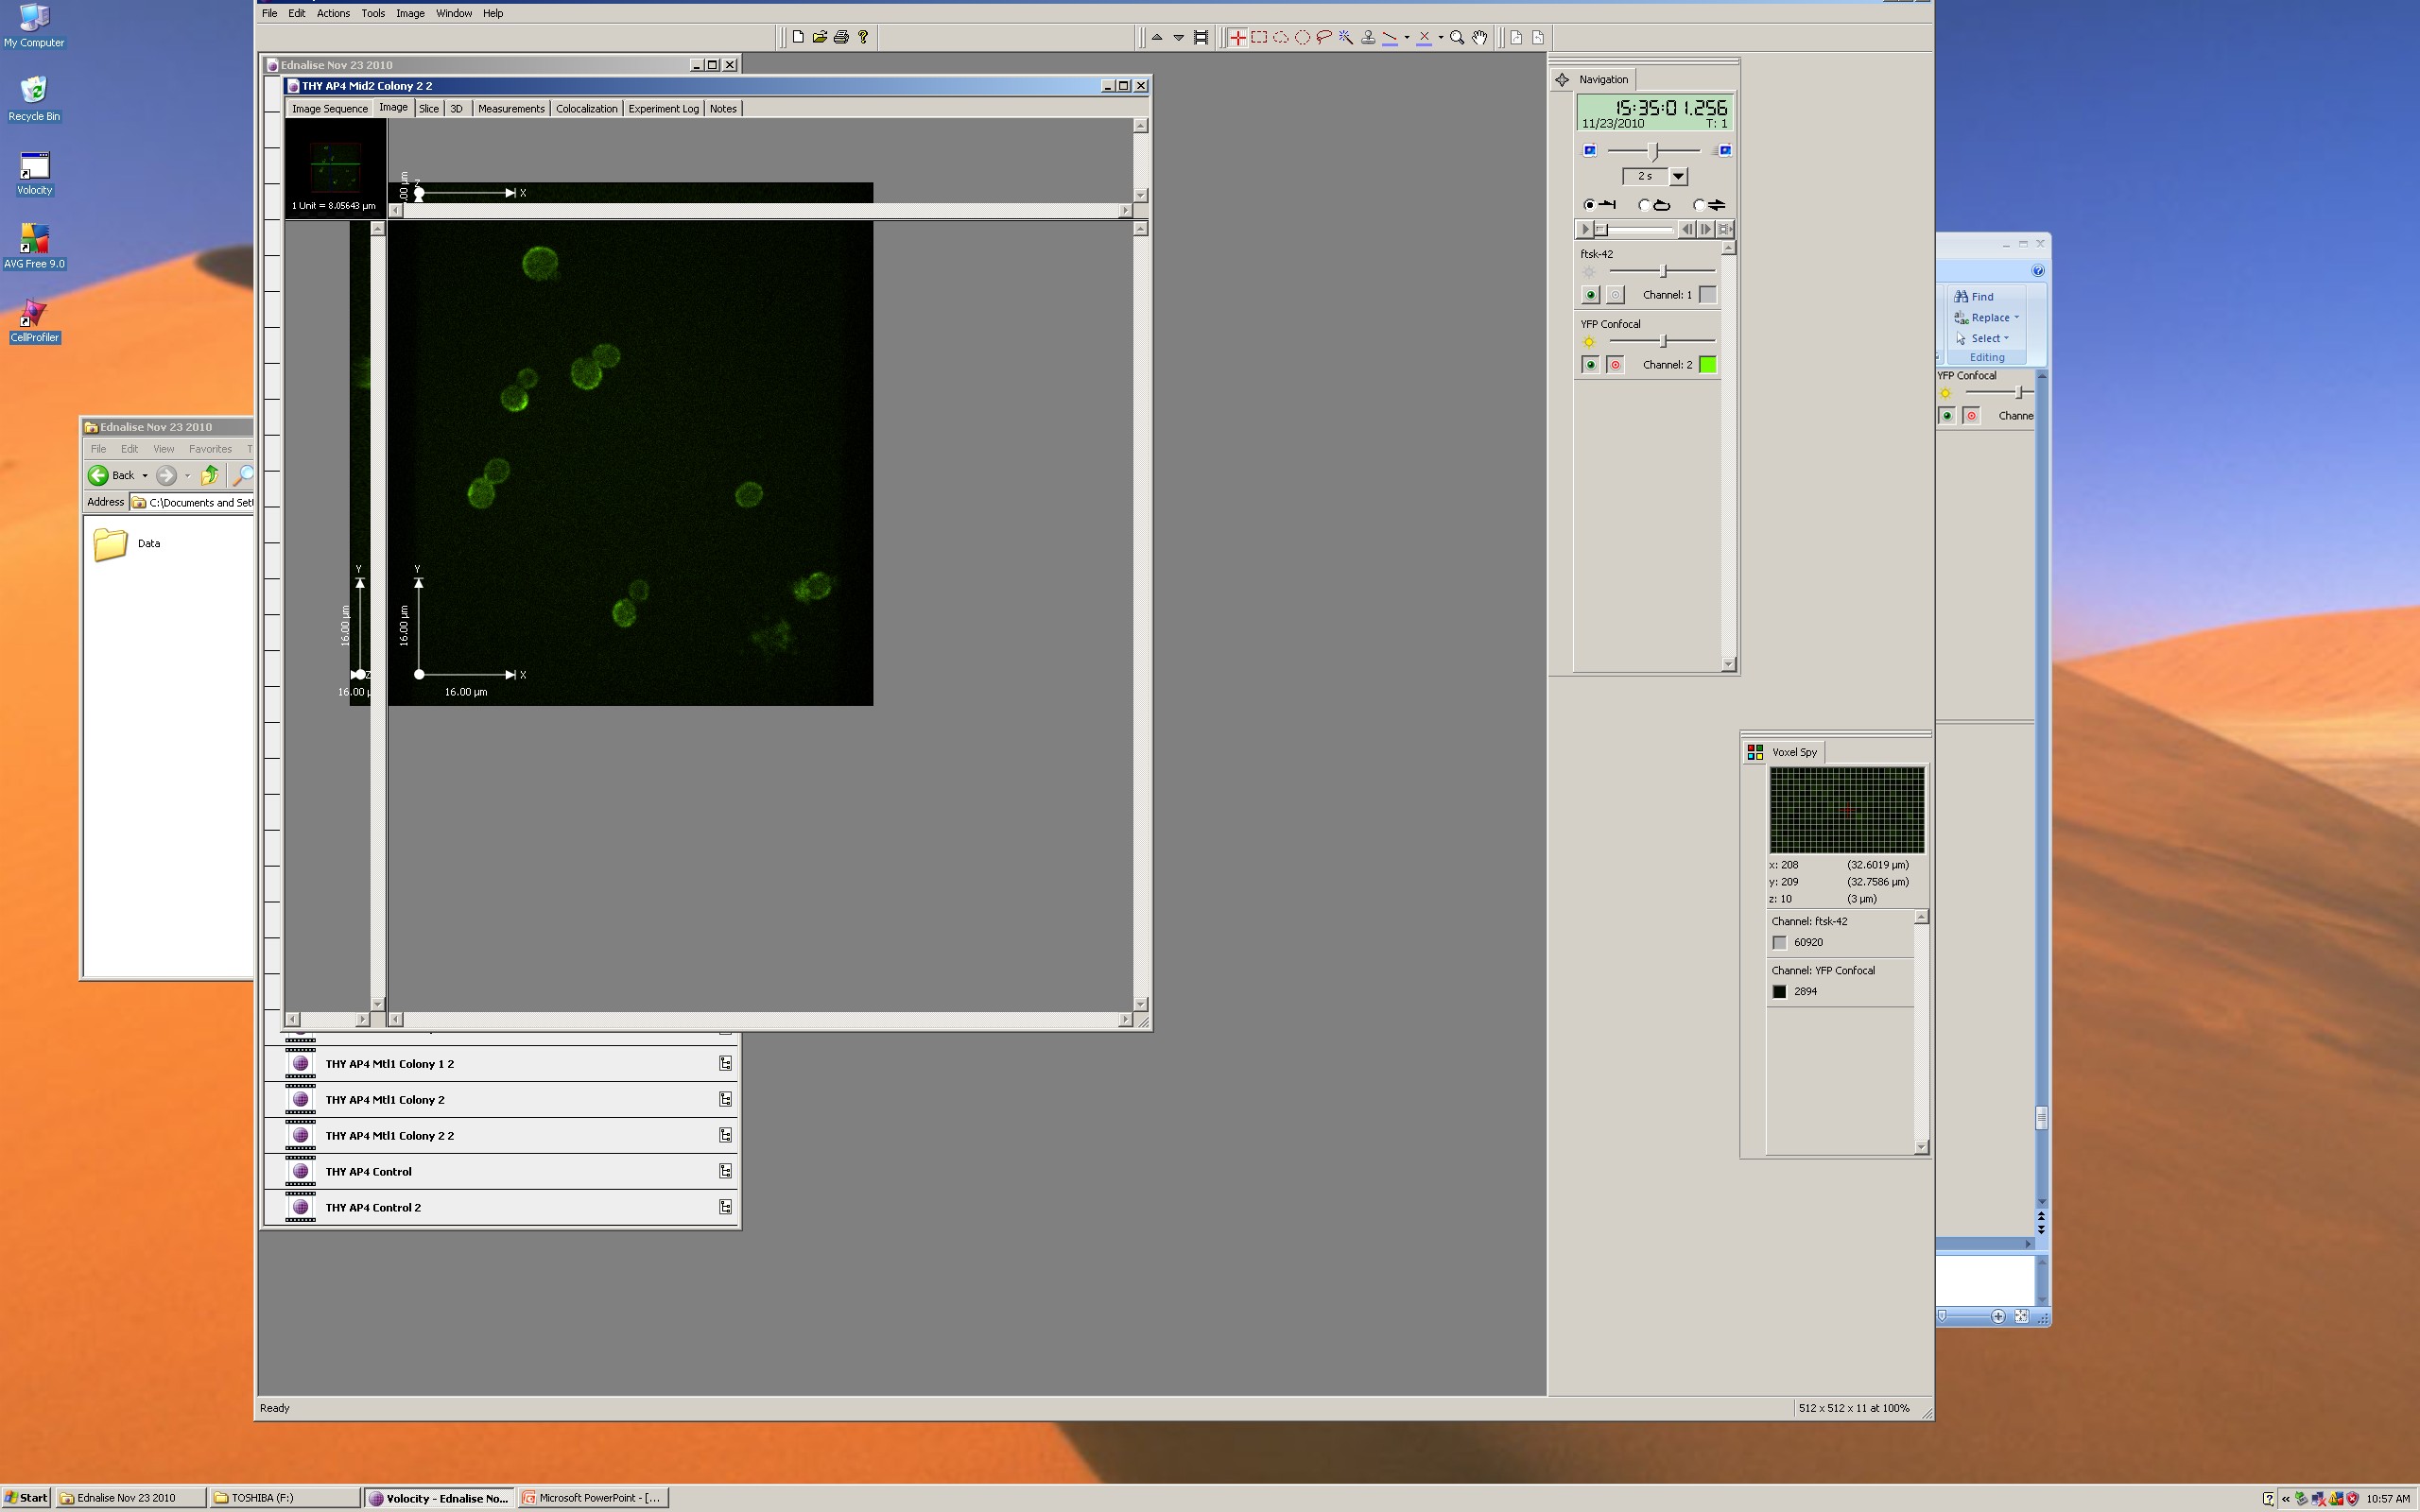

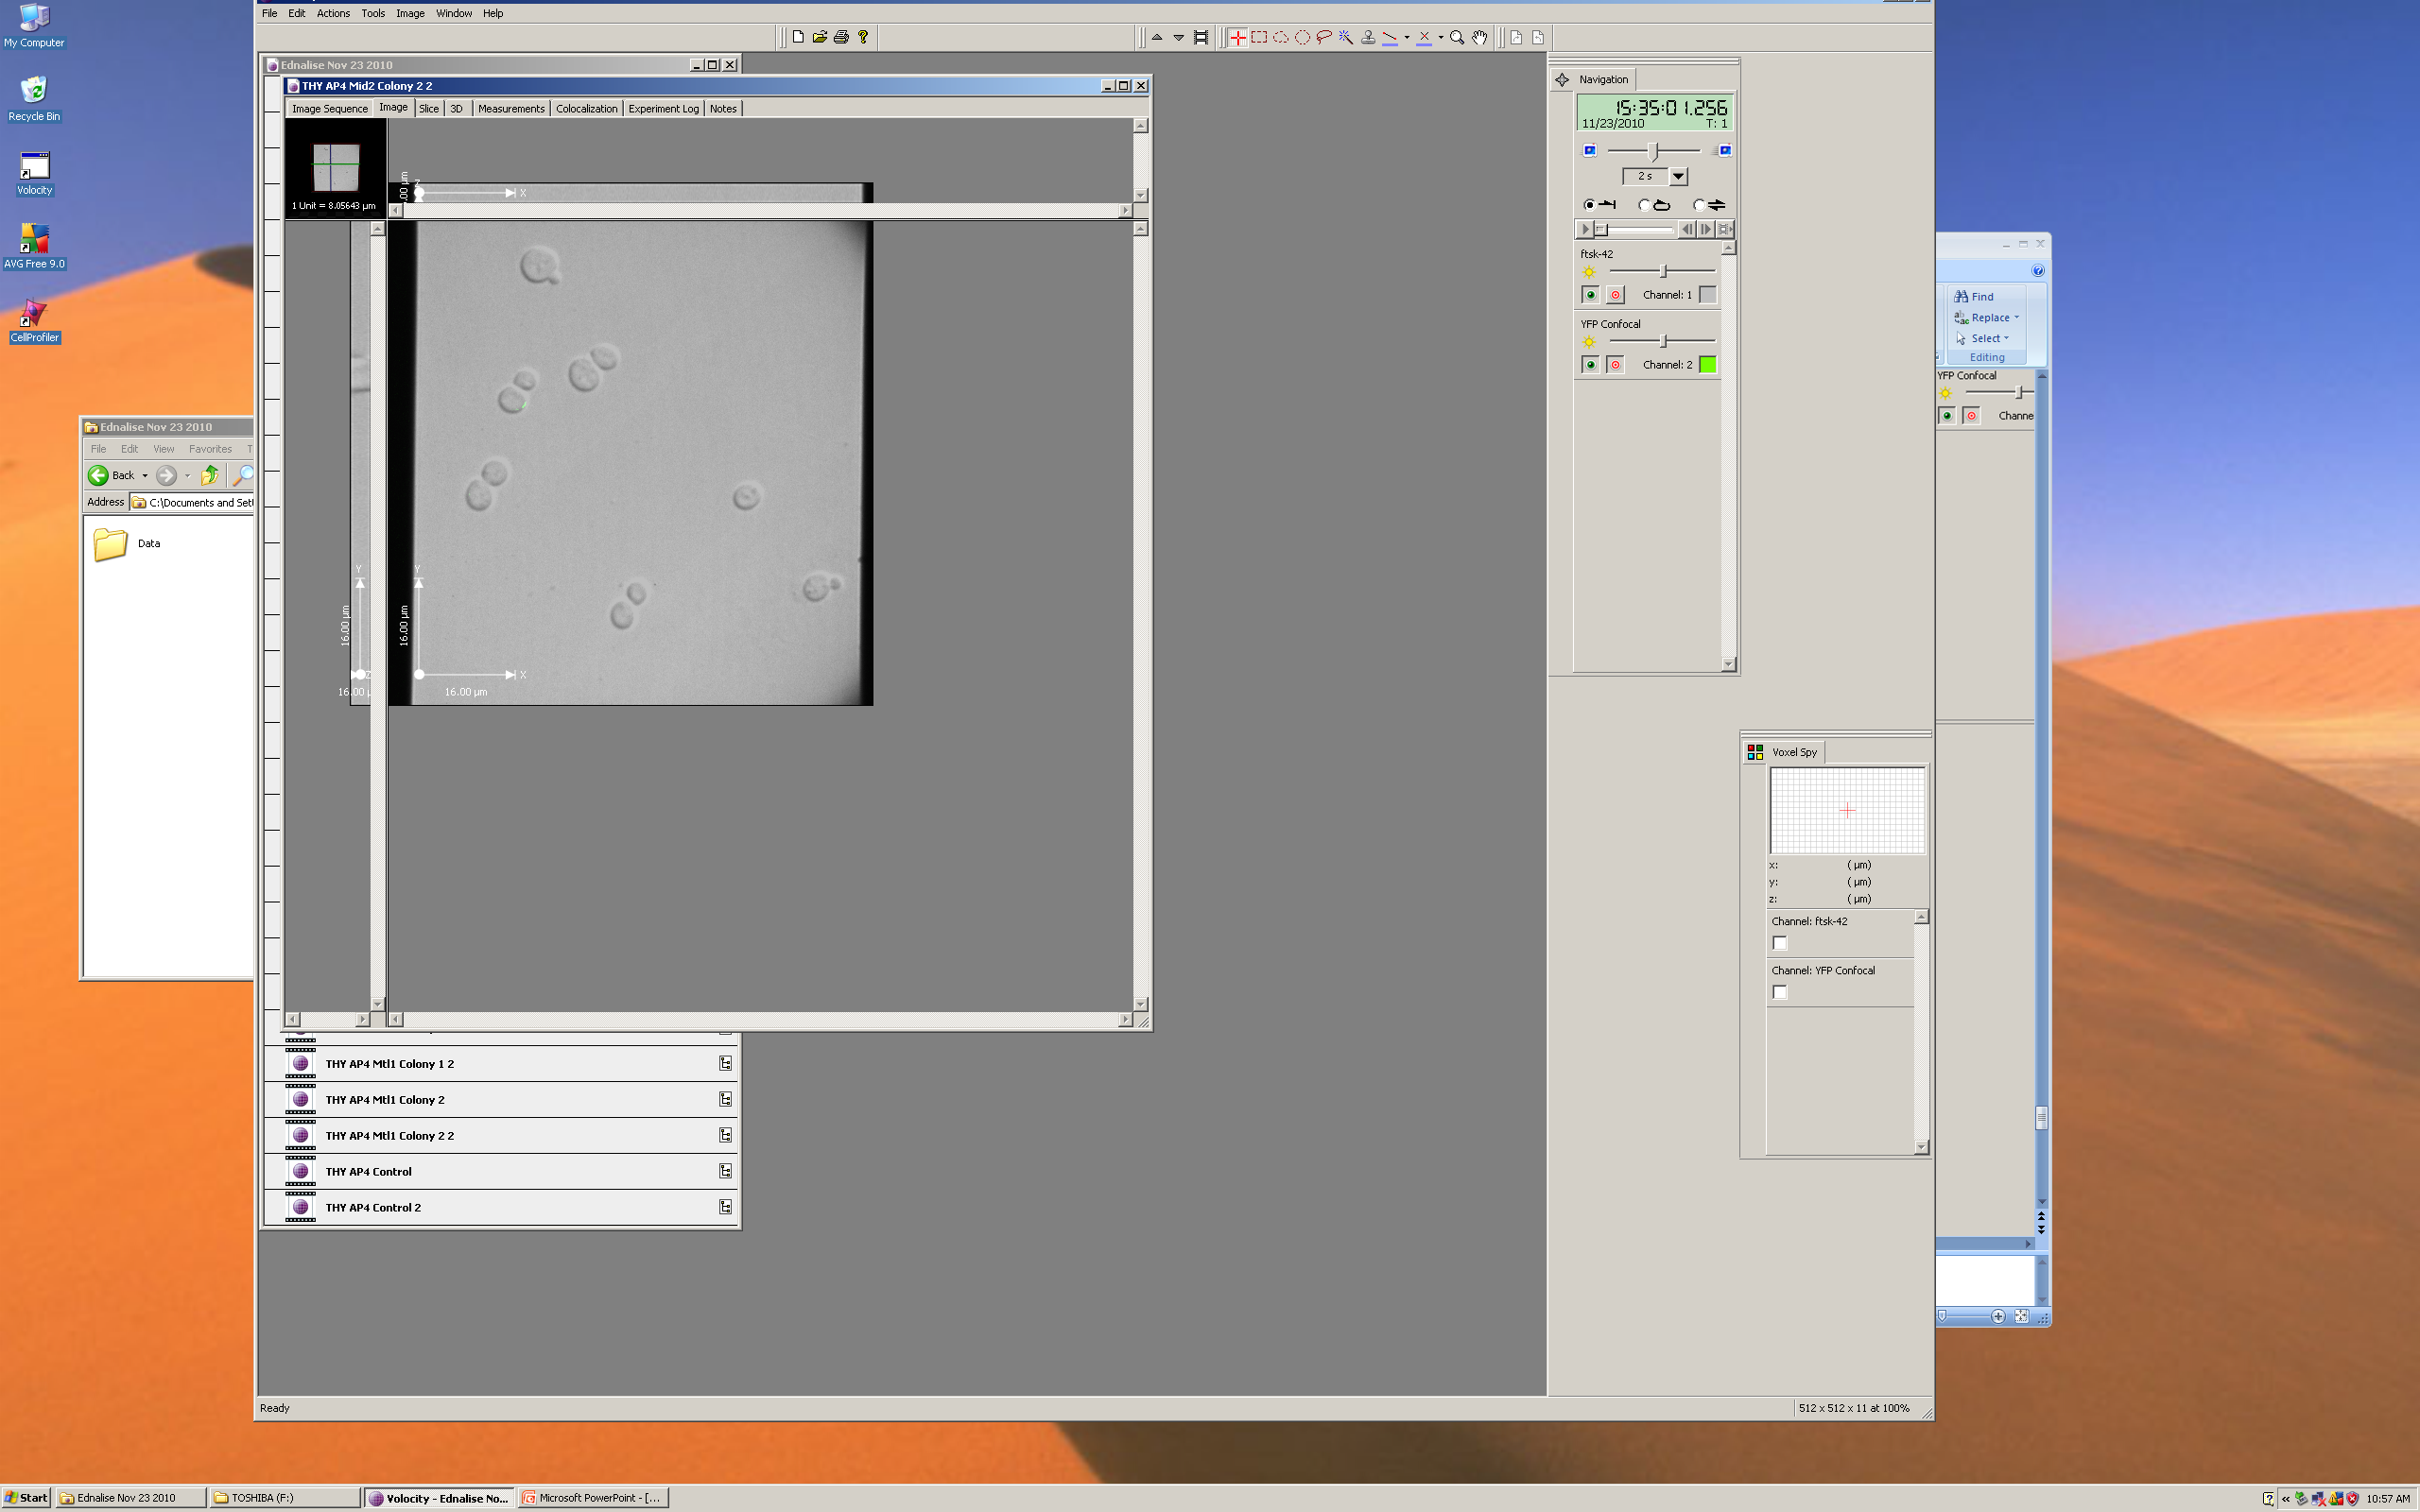


**Figure S2.** Localization of Wsc1p (A) and Mid2p (B and C) at the emerging bud (red arrows) and yeast plasma membrane respectively. Images were acquired with a Leica DMI 6000B Inverted Confocal Microscope. YFP= Yellow Fluorescent Protein, DIC= Differential Interference Contrast

Mid2p

Wsc1p

Mid2p

Wsc1p

Mid2 Wsc1

THY THY

THY.AP4 L3 L2

Wsc1 Wsc3 Wsc3 Mid2 L40 L40 L40 L40

L40 L3 L3 L3 L3

kDa

170

130

100

70

kDa

170

130

100

70

**A)**

**B)**

**Figure S3.** Validation of MYTH-tagged Mid2p and Wsc1p expression by Western blot. A) THY.AP4 and B) L40 background strains. Total cell extract of sensor bait constructs were examined using antibody against the VP16 component of the MYTH tag. THY.AP4 or L40 cells were used as negative control.


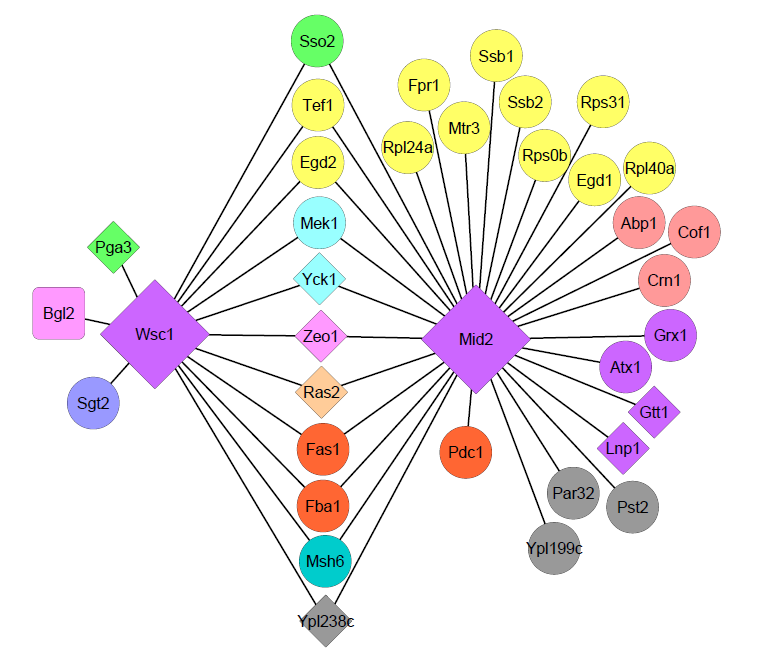


iMYTH interaction

Cell Wall protein

Cytoplasmic protein

Membrane protein

**Figure S4.** WSC1 and MID2 - iMYTH interactome showing only interactors identified in the iMYTH screen at 30o. The 14 novel Wsc1p and 31 Mid2p interactors are shown as color-coded geometric shapes according to the gene ontology annotation of biological process and localization. See Figure 3 for details. Black edge represents physical protein-protein interactions.

**Figure S5.** Growth curve analysis of single and double mutants exposed at different concentrations of Hydrogen Peroxide. The plates were incubated at 27° and OD600 measurements were taken every 15 min for up to 24 hrs.

**Figure S6.** Growth curve analysis of single and double mutants exposed at different concentrations of Caspofungin. The plates were incubated at 27° and OD600 measurements were taken every 15 min for up to 24 hrs. The 7.5ng/ml Caspofungin graph (average of two replicates). Control, 18.75ng/ml, 37.5ng/ml, 75ng/ml Caspofungin graphs (average of three or more replicates).

| Wt *mid2∆ atx1∆ atx1∆*  *mid2∆*  - + - + - + - + 1mM H2O2 |
| --- |
| 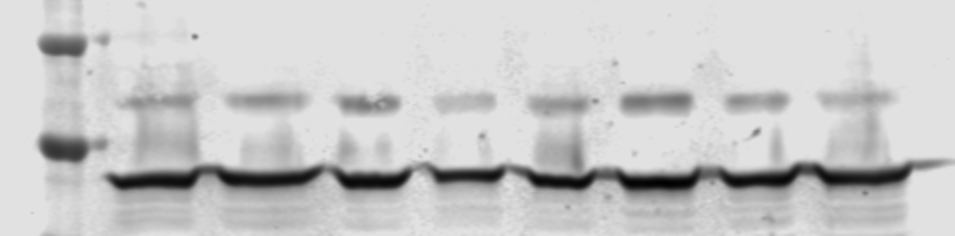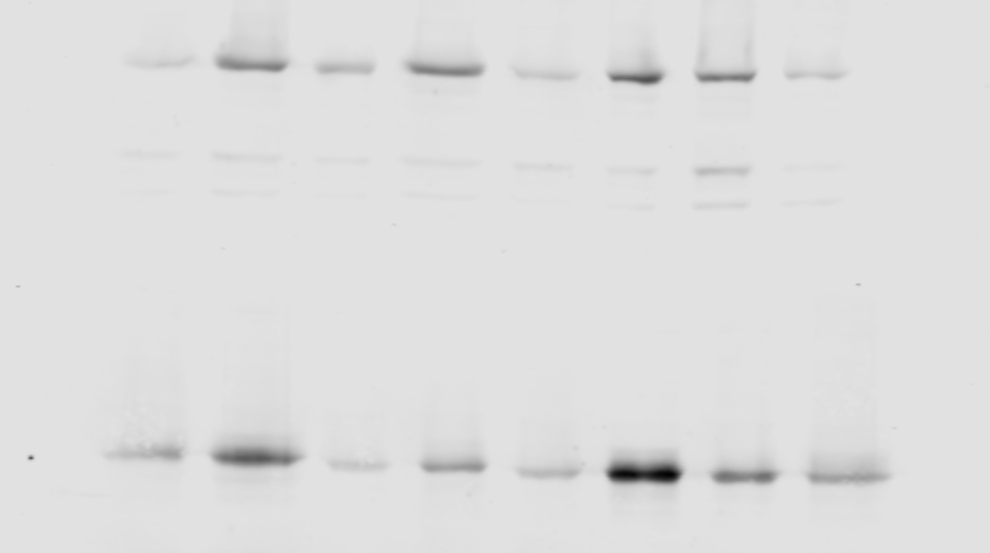 P-Slt2p  Pgk1p |
|  |
|  |
| *Wt mid2∆ grx1∆ grx1∆*  *mid2∆*  - + - + - + - + 1mM H2O2  P-Slt2p  Pgk1p 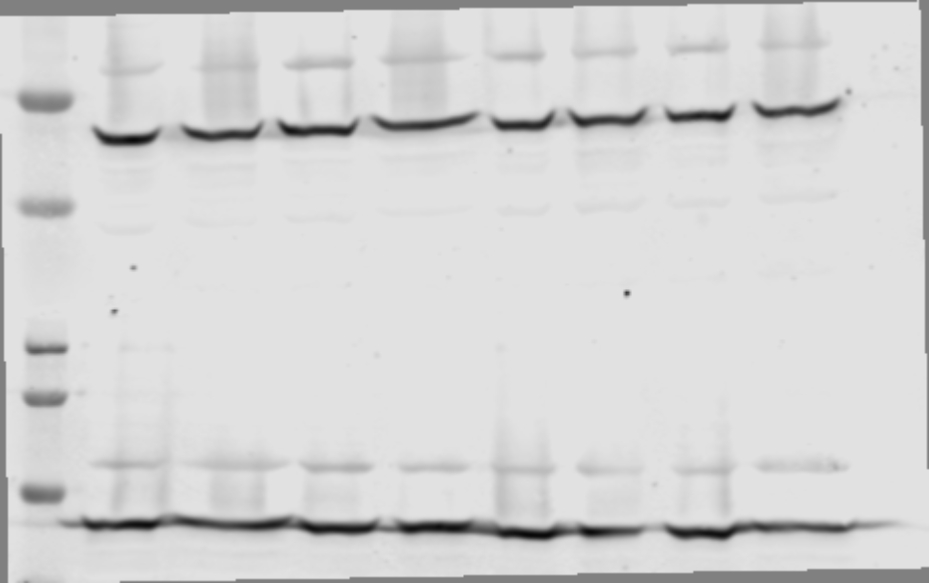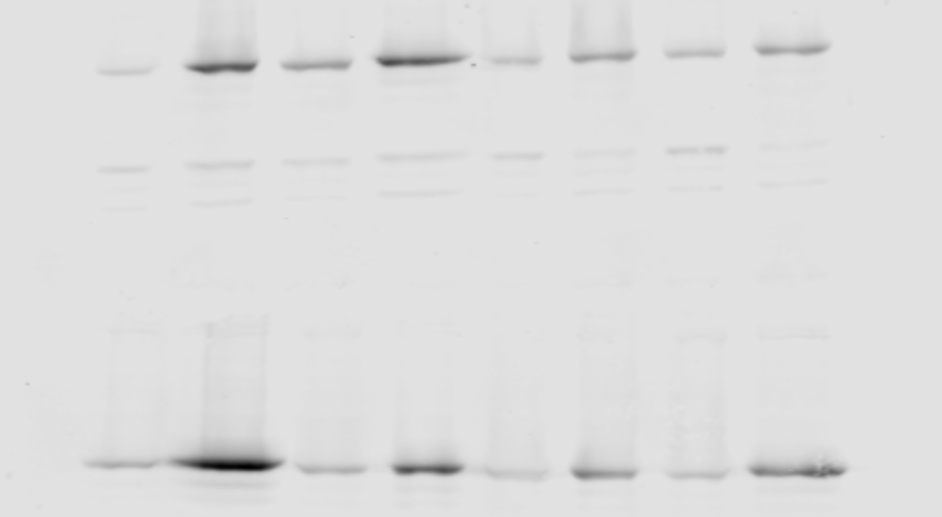 |
|  |
|  |
|  |
| Wt *wsc1∆ mid2∆ ras2∆ ras2∆ ras2∆*  *wsc1∆ mid2∆*  - + - + - + - + - + - + 1mM H2O2 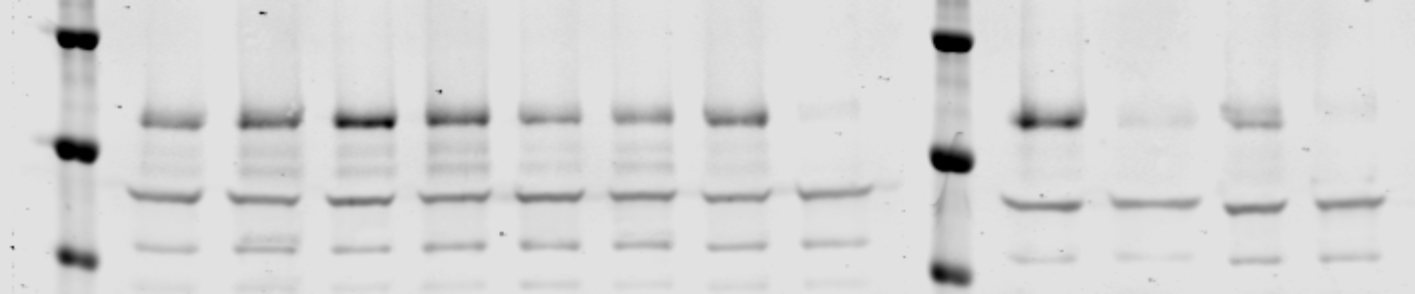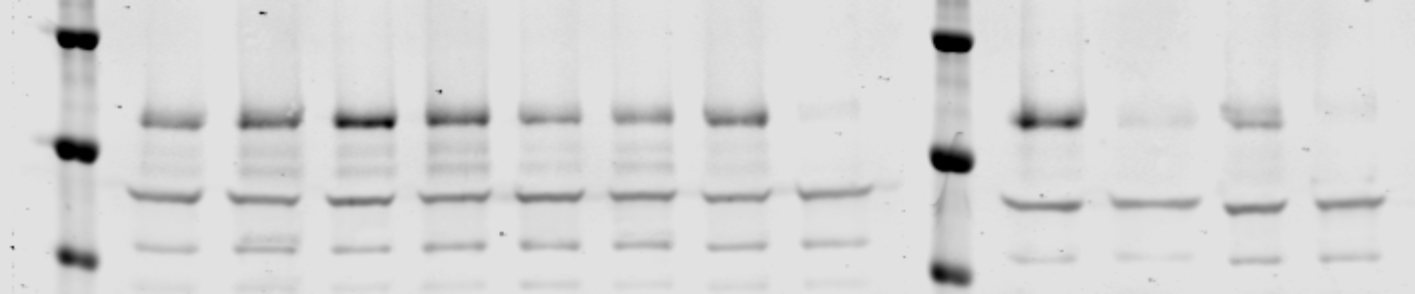 P-Slt2p  Pgk1p |
|  |

**Figure S7.** Western blot analysis showing the phosphorylation of Slt2p in single and double mutant strains treated with 1mM hydrogen peroxide (H2O2) for 1 hr at 27°. Blots shown are representative images from 3 biological replicates. The loading control used was Pgk1p.

| Wt *mid2∆ ras2∆ ras2∆*  *mid2∆*  - + - + - + - + 75ng/ml Caspofungin |
| --- |
| 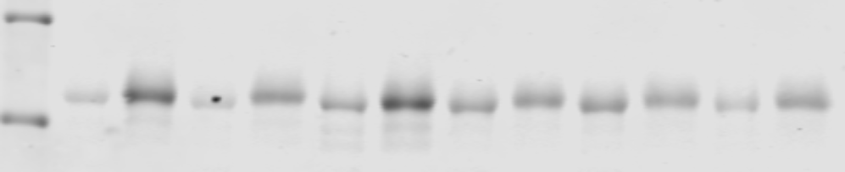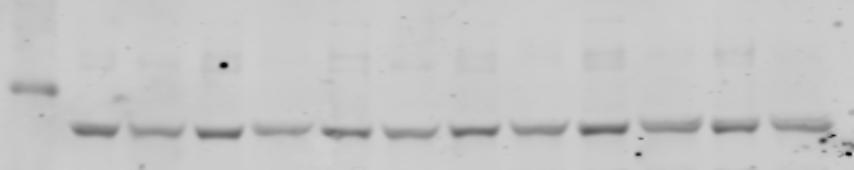 P-Slt2p  Pgk1p |
|  |
|  |
| Wt *wsc1∆ ras2∆ ras2∆*  *wsc1∆*  - + - + - + - + 75ng/ml Caspofungin |
| P-Slt2p  Pgk1p 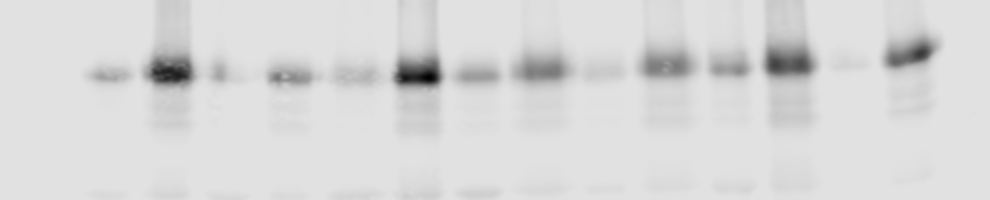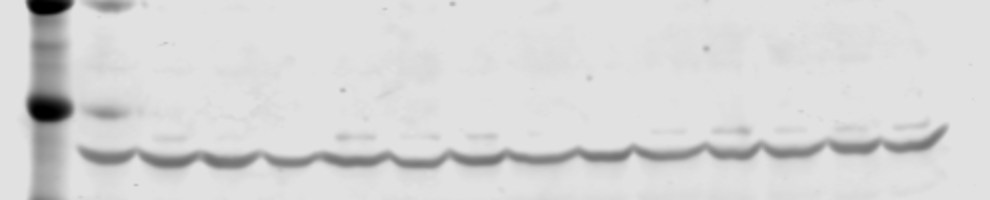 |
|  |
|  |
| Wt *mid2∆ grx1∆ grx1∆*  *mid2∆*  - + - + - + - + 75ng/ml Caspofungin |
| 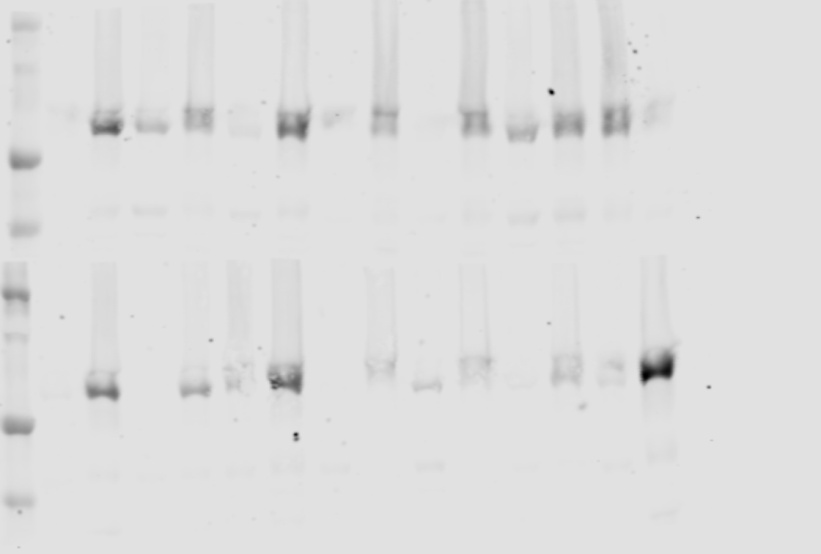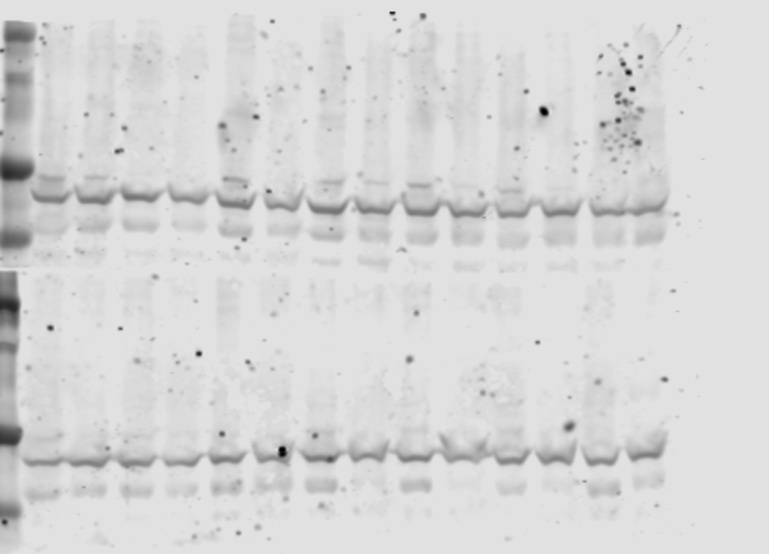 P-Slt2p  Pgk1p |
|  |
|  |
| *Wt mid2∆ zeo1∆ zeo1∆ wsc1∆ zeo1∆*  *mid2∆ wsc1∆*  - + - + - + - + - + - + 75ng/ml Caspofungin 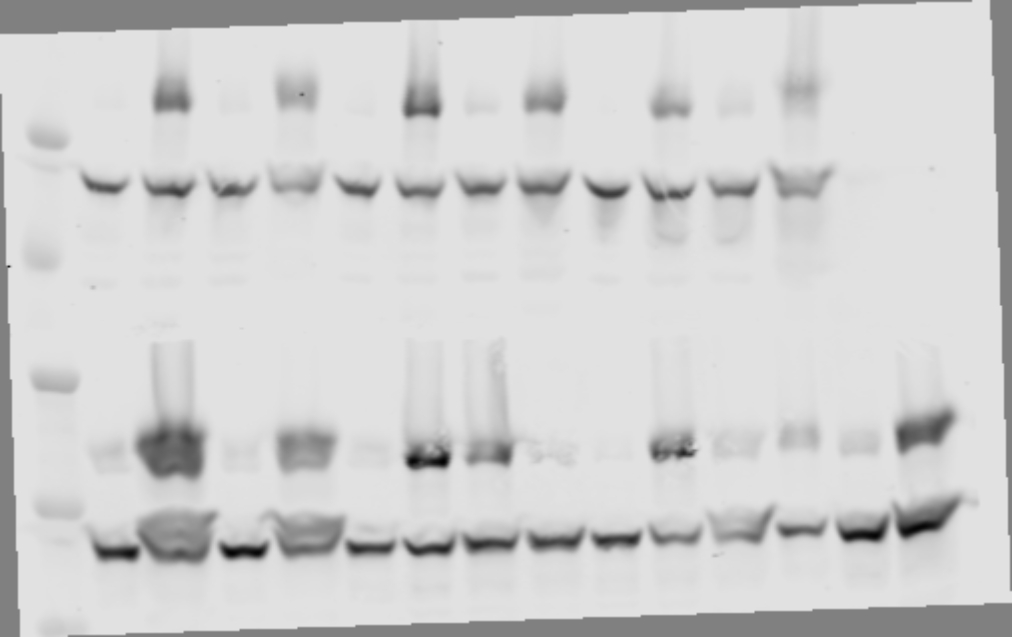 P-Slt2p  Pgk1p |

**Figure S8.** Western blot analysis showing the phosphorylation of Slt2p in single and double mutant strains treated with 75ng/ml Caspofungin for 1 hr at 27°. Blots shown are representative images from 3 biological replicates. The loading control used was Pgk1p.


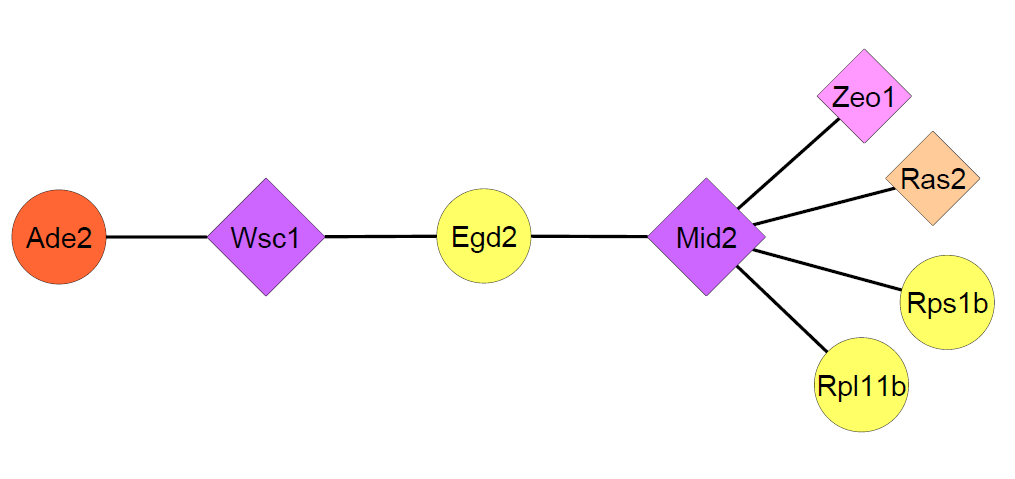


**Figure S9.** Network graph of the Wsc1p and Mid2p interactome identified by iMYTH screen at 37o. At 37o the predominant interactor between Wsc1p and Mid2p was Egd2p identified by a yellow circle.

.

**Table S3. Percentages of positive interactors for Wsc1p and Mid2p identified by two independent iMYTH screens performed at 37o.**

| Interactor name |  | Percentage of hits for Mid2 bait protein |  | Percentage of hits for Wsc1 bait protein |
| --- | --- | --- | --- | --- |
| Egd2 |  | 90 |  | 83 |
| Rps1b |  | 1.08 |  | 0 |
| Ras2 |  | 2.17 |  | 0 |
| Zeo1 |  | 1.08 |  | 0 |
| Rpl11b |  | 1.08 |  | 0 |
| Ade2 |  | 0 |  | 5.5 |

**
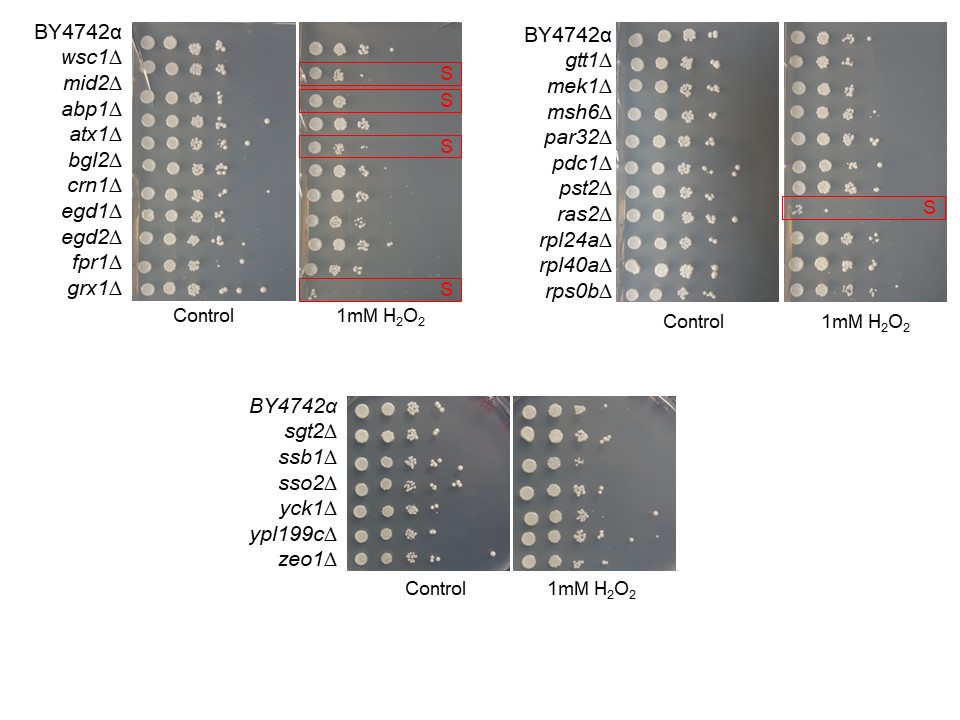

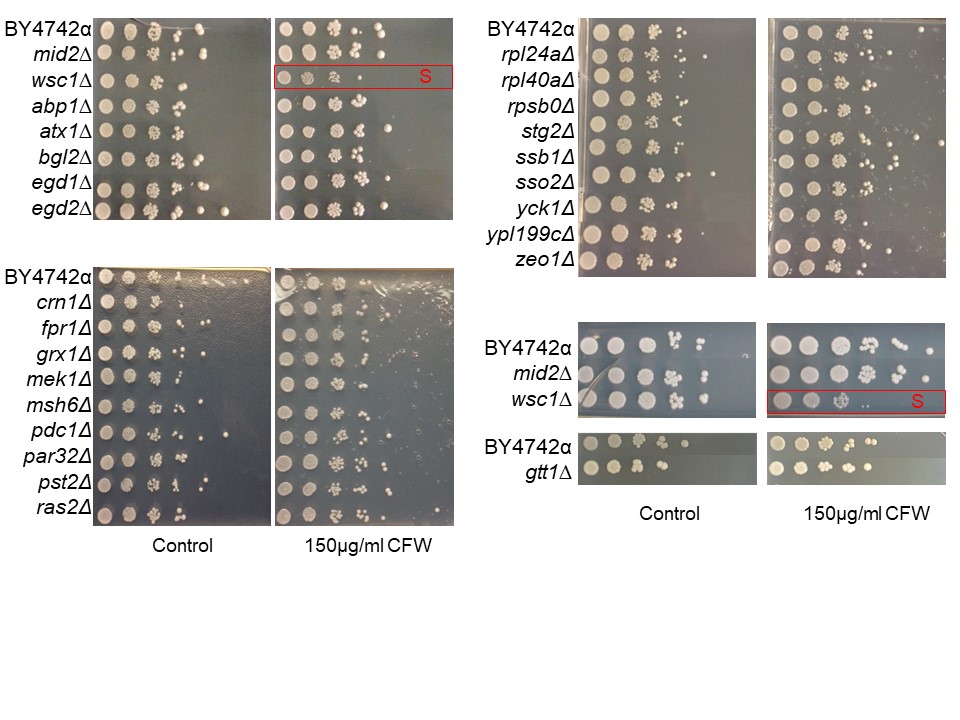
A)**

**B)**

**
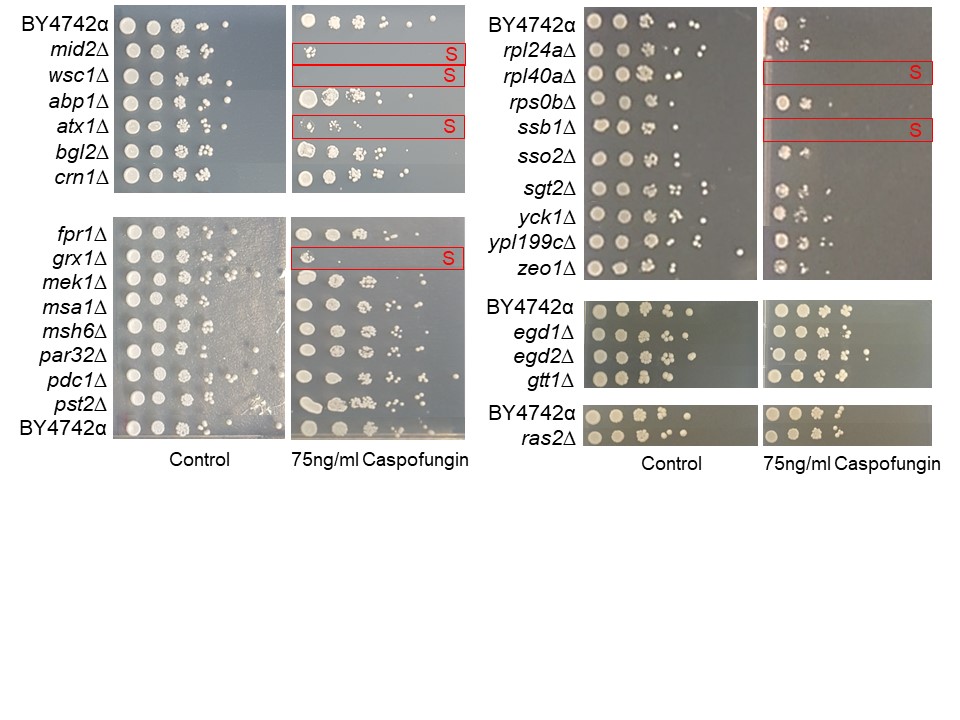
C)**

**
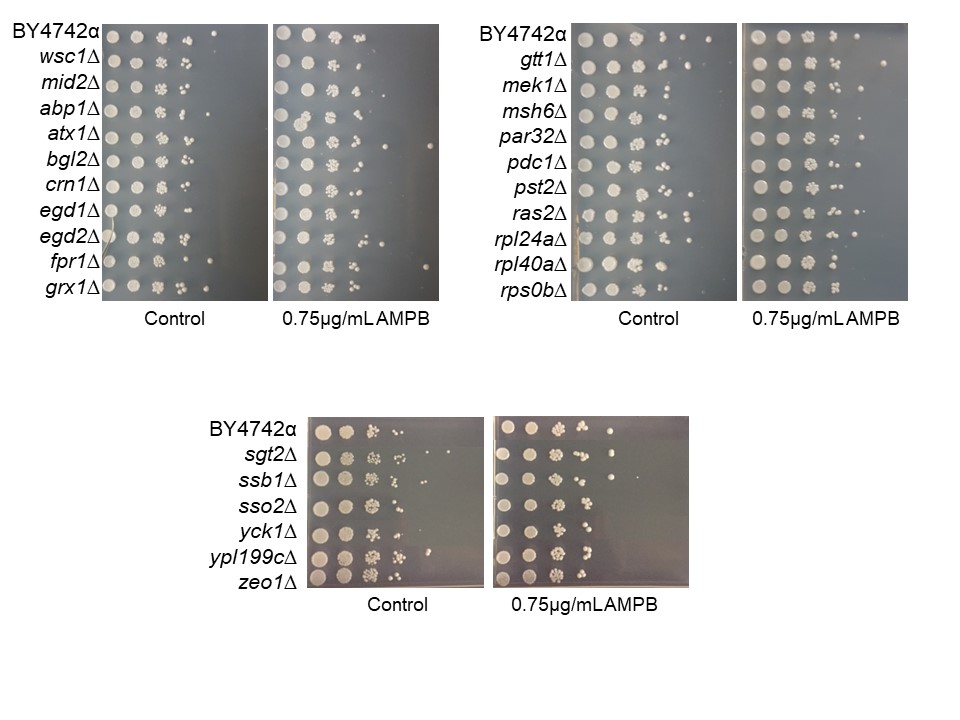
D)**

**Figure S10.** A representative drop dilution assayof sensor and interactor null mutants exposed to stress conditions. Identical volumes of 10-fold serial dilutions of wild type (BY4724α) and single mutants were spotted onto CSM plates and incubated at 30o; A)1mM hydrogen peroxide (H2O2, oxidative stress); B) 150 µg/ml Calcofluor white (CFW); C) 75 ng/ml Caspofungin (CSP) and D) 0.75 μg/ml Amphotericin B (AMPB). The plates were inspected after three days of incubation.
